# Supplementary material for: sRNAscanner: A Computational Tool for Intergenic Small RNA Detection in Bacterial Genomes
Source: PLoS One. 2010 Aug 5;5(8):e11970. doi: 10.1371/journal.pone.0011970 (PMC2916834; doi:10.1371/journal.pone.0011970)
Supplement: Figure S2 — R1 versions of random matrices. (0.03 MB PDF) [file pone.0011970.s007.pdf]

**(A) PWM1-R1**

```

A|0.435318|0.969401|-0.200671|-0.200671|-0.788457|-0.788457|
C|0.167054|-2.3979|-0.788457|-2.3979|0.820981|-0.788457|
G|-0.788457|-2.3979|-2.3979|0.820981|-0.788457|-0.788457|
T|-0.200671|0.167054|0.969401|-0.200671|-0.200671|0.969401|

```

**(B) PWM2-R1**

```

A|0.646627|1.21302|-2.3979|-2.3979|-0.788457|0.820981|
C|-0.200671|-2.3979|-2.3979|-2.3979|-0.200671|-2.3979|
G|-0.200671|-2.3979|-0.788457|-2.3979|-0.788457|-0.788457|
T|-0.788457|-0.788457|1.21302|1.31568|0.820981|0.167054|

```

**(C) PWM3-R1**

```

A|-0.893818|-0.526093|-0.526093|-0.04652|-0.893818|-0.257829|-0.257829|
  -0.526093|0.127833|0.127833|0.405465|-0.526093|-0.526093|-0.257829|
  -0.893818|-0.893818|0.127833|-0.526093|-0.257829|-0.257829|-0.04652|
  -1.4816|-1.4816|-0.893818|-0.257829|0.127833|0.276253|-0.526093|
  -0.893818|-0.526093|-0.526093|
C|-1.4816|0.127833|-0.257829|-0.893818|-0.04652|0.127833|0.127833|
  0.405465|-1.4816|-0.526093|-0.526093|-0.04652|-0.893818|0.405465|
  -0.04652|0.276253|0.127833|-0.257829|-0.526093|-0.04652|-0.04652|
  -3.09104|-0.257829|0.276253|-0.257829|-0.04652|-0.257829|-0.893818|
  0.405465|0.127833|-0.257829|
G|-0.526093|-0.257829|-0.893818|0.127833|0.276253|-0.04652|-0.257829|
  -0.257829|-0.893818|-1.4816|-0.04652|0.405465|-0.257829|-0.04652|
  0.276253|0.127833|-0.257829|0.276253|0.519875|0.276253|0.405465|
  0.276253|0.62253|0.405465|-1.4816|-0.04652|-0.893818|-1.4816|
  0.127833|0.519875|0.276253|
T|1.01983|0.405465|0.800778|0.405465|0.276253|0.127833|0.276253|
  0.127833|0.800778|0.71562|-0.04652|-0.04652|0.800778|-0.257829|
  0.276253|0.127833|-0.04652|0.276253|-0.04652|-0.04652|-0.526093|
  0.879249|0.127833|-0.257829|0.800778|-0.04652|0.405465|1.01983|
  -0.04652|-0.526093|0.276253|

```

**Figure S2.** The R1 versions of random position weight matrices constructed by randomly shuffling columns within individual genuine matrices. (A) PWM1-R1 constructed from PWM1. (B) PWM2-R1 constructed from PWM2. (C) PWM3-R1 constructed from PWM3.
