# Supplementary material for: sRNAscanner: A Computational Tool for Intergenic Small RNA Detection in Bacterial Genomes
Source: PLoS One. 2010 Aug 5;5(8):e11970. doi: 10.1371/journal.pone.0011970 (PMC2916834; doi:10.1371/journal.pone.0011970)
Supplement: File S1 — Details of known and novel sRNAs predicted by sRNAscanner in the 13 genomes analysed. (0.47 MB XLS) [file pone.0011970.s011.xls]

## Sheet: Sheet1
Sheet 1: Bacillus anthracis 'Ames' (AE016879.fna) 47 known and 274 'novel' sRNAs in positive strand
Start1	D1	D2	End3	Score1	Score2	Score3	CSS	Comment
10529	16	342	10929	2.95936	5.00866	6.33879	14.3068	Putative sRNA
14135	13	170	14360	2.52559	6.03031	7.07134	15.6272	Putative sRNA
25047	17	328	25434	2.94218	3.18153	5.81225	11.936	SRP_bact
30323	16	342	30723	2.95936	5.00866	6.33879	14.3068	Putative sRNA
33929	13	169	34153	2.52559	6.03031	7.0606	15.6165	Putative sRNA
54153	17	256	54468	3.69557	3.94138	7.09328	14.7302	Putative sRNA
87024	13	179	87258	2.52559	6.03031	8.60368	17.1596	Putative sRNA
106275	17	121	106455	4.34949	6.03031	5.65487	16.0347	L10_leader
138491	16	289	138838	2.79376	4.52908	7.01292	14.3358	Putative sRNA
138828	15	92	138977	2.94218	4.52908	7.78377	15.255	Putative sRNA
144946	14	293	145295	2.94218	6.03031	5.38676	14.3593	Putative sRNA
150158	16	106	150322	4.98548	6.03031	3.95347	14.9693	Putative sRNA
153528	12	62	153644	2.30619	6.03031	6.31621	14.6527	Putative sRNA
157500	16	60	157618	2.89322	4.52908	4.34682	11.7691	glmS
185515	17	176	185750	4.34949	6.03031	6.71579	17.0956	SAM
210969	14	80	211105	2.35439	5.18301	7.368	14.9054	Putative sRNA
216066	18	298	216424	3.37605	3.94135	7.56309	14.8805	Putative sRNA
245491	13	175	245721	2.13983	5.00866	7.2137	14.3622	Putative sRNA
250808	13	310	251173	2.52559	6.03031	5.94066	14.4966	Putative sRNA
260605	18	176	260841	4.71722	4.42087	7.55928	16.6974	Purine
262555	17	87	262701	4.98548	3.76694	6.3973	15.1497	Purine
271387	13	171	271613	2.52559	6.03031	5.66767	14.2236	Putative sRNA
284685	13	181	284921	2.52559	6.03031	6.473	15.0289	Putative sRNA
294658	13	178	294891	2.52559	6.03031	7.70812	16.264	Putative sRNA
295200	14	269	295525	2.89322	5.00866	7.81864	15.7205	Putative sRNA
295293	12	178	295525	4.98548	4.52908	7.81864	17.3332	Purine
320543	17	65	320667	4.34949	6.03031	5.78162	16.1614	SAM
376635	18	94	376789	4.98548	4.42087	4.91025	14.3166	Putative sRNA
399283	17	156	399498	2.89322	5.00866	3.80375	11.7056	TPP
414083	14	223	414362	2.52553	5.37638	8.516	16.4179	T-Box
432987	12	76	433117	3.10778	6.03031	6.4084	15.5465	Putative sRNA
437966	13	120	438141	2.94218	5.18301	6.7926	14.9178	Putative sRNA
448719	15	139	448915	3.32784	5.18301	6.28608	14.7969	Putative sRNA
448890	13	188	449133	2.74006	4.52908	9.37563	16.6448	Putative sRNA
461234	17	314	461607	3.16148	5.37638	6.24588	14.7837	Putative sRNA
487271	18	51	487382	2.94218	4.42087	7.02001	14.3831	Putative sRNA
540945	18	215	541220	3.32784	6.03031	5.92849	15.2866	Putative sRNA
561309	17	70	561438	3.32784	5.37638	5.42555	14.1298	Putative sRNA
567871	12	325	568250	3.96383	5.37638	5.23427	14.5745	Putative sRNA
577434	13	99	577588	2.94218	4.42087	6.93294	14.296	Putative sRNA
681931	12	143	682128	3.17942	4.52908	7.96104	15.6695	Putative sRNA
691318	13	206	691579	2.35439	5.37638	7.97928	15.71	Putative sRNA
707627	15	72	707756	2.94218	5.37638	6.01377	14.3323	Putative sRNA
732605	16	346	733009	2.67391	6.03031	5.64622	14.3504	Putative sRNA
751864	12	342	752260	2.30619	6.03031	7.37119	15.7077	TPP
752054	17	147	752260	2.74006	5.18301	7.37119	15.2943	TPP
760225	17	213	760497	3.32784	3.76694	4.85854	11.9533	ydaO_yuaA
761344	17	175	761578	3.96383	4.59522	6.15134	14.7104	ydaO_yuaA
802946	15	111	803114	3.96383	5.00866	6.40528	15.3778	Putative sRNA
817192	17	276	817527	3.96383	4.42087	6.80373	15.1884	Putative sRNA
823974	15	158	824189	4.98548	4.02883	6.48774	15.5021	yybP_ykoY
841409	18	76	841545	4.98548	5.00866	6.65529	16.6494	Putative sRNA
859389	18	193	859642	4.98548	2.81143	7.29812	15.095	Putative sRNA
861957	18	264	862281	2.94218	5.37638	6.24901	14.5676	Putative sRNA
862829	14	201	863086	3.96383	6.03031	6.94231	16.9365	Putative sRNA
899592	15	183	899832	2.89322	5.37638	7.71922	15.9888	Putative sRNA
899688	13	89	899832	3.96383	5.18301	7.71922	16.8661	Putative sRNA
921326	12	344	921724	3.54715	3.94131	8.69877	16.1872	Putative sRNA
950236	17	247	950542	3.96383	4.52908	5.56784	14.0608	Putative sRNA
955021	16	199	955278	2.35439	5.00866	6.87293	14.236	Putative sRNA
962724	12	99	962877	3.96383	4.59522	6.13588	14.6949	Putative sRNA
982171	17	63	982293	2.79376	4.42087	8.14776	15.3624	Putative sRNA
1011726	16	235	1012019	3.54715	3.57357	8.07086	15.1916	Putative sRNA
1029895	17	143	1030097	4.34949	5.00866	6.58497	15.9431	Putative sRNA
1044322	16	274	1044654	3.22762	4.42087	6.38121	14.0297	Putative sRNA
1086354	13	346	1086755	2.94218	4.02883	7.73749	14.7085	Putative sRNA
1108565	13	211	1108831	3.96383	5.18301	6.44863	15.5955	Putative sRNA
1109486	15	163	1109706	3.32784	2.52761	8.4561	14.3116	Putative sRNA
1131012	14	318	1131386	2.94218	6.03031	5.09894	14.0714	Putative sRNA
1141266	18	56	1141382	2.57378	4.42087	7.20555	14.2002	Putative sRNA
1141466	14	296	1141818	3.22762	4.42087	8.07106	15.7196	Putative sRNA
1202428	18	255	1202743	4.34949	6.03031	4.11354	14.4933	T-Box
1202904	13	76	1203035	2.20597	3.94132	5.61926	11.7666	T-Box
1214135	16	241	1214434	3.16148	6.03031	6.52943	15.7212	Putative sRNA
1254376	14	237	1254669	3.22762	5.00866	8.61888	16.8552	Putative sRNA
1254560	15	52	1254669	2.79376	4.52908	8.61888	15.9417	Putative sRNA
1278385	15	231	1278673	3.96383	3.94139	6.15901	14.0642	Putative sRNA
1289482	17	76	1289617	4.98548	4.02883	6.40932	15.4236	Putative sRNA
1298705	17	88	1298852	2.52557	5.00866	7.4739	15.0081	PreQ1
1304072	15	77	1304206	2.52556	3.76694	8.50986	14.8024	Putative sRNA
1309136	14	100	1309292	3.96383	4.42087	5.88684	14.2715	Putative sRNA
1340131	17	80	1340270	2.59164	3.57357	7.15988	13.3251	T-Box
1348188	17	170	1348417	3.96383	5.18301	5.16589	14.3127	Putative sRNA
1360782	18	226	1361068	4.98548	4.52908	5.65421	15.1688	Lysine
1362620	15	140	1362817	3.37605	4.42087	6.05218	13.8491	SAM
1369604	17	273	1369936	3.96383	6.03031	6.30877	16.3029	T-Box
1375284	17	171	1375514	4.34949	3.57357	6.81102	14.7341	SAM
1389217	13	291	1389563	3.76171	4.16136	6.13684	14.0599	Putative sRNA
1422515	17	204	1422778	3.96383	6.03031	3.2649	13.259	FMN
1471322	13	238	1471615	2.35439	4.42087	7.62612	14.4014	Putative sRNA
1489280	18	166	1489506	2.52549	2.41939	7.1228	12.0677	RNaseP_bact_a
1497533	17	170	1497762	3.16148	6.03031	10.2707	19.4625	Purine
1507142	15	179	1507378	3.96383	4.02883	5.56193	13.5546	6S
1507438	14	120	1507614	2.94218	2.41939	5.83121	11.1928	6S
1510280	14	296	1510632	2.74006	3.76694	6.31599	12.823	ykoK
1520865	16	292	1521215	2.94218	2.91965	8.97747	14.8393	Putative sRNA
1595512	13	241	1595808	4.98548	4.52908	4.87487	14.3894	Putative sRNA
1603019	15	48	1603124	2.35439	6.03031	6.39137	14.7761	Putative sRNA
1604442	15	50	1604549	3.32784	3.37495	7.53079	14.2336	Putative sRNA
1609914	16	80	1610052	3.10778	6.03031	5.7547	14.8928	Putative sRNA
1634400	12	258	1634712	2.13983	6.03031	6.30376	14.4739	Putative sRNA
1639824	13	79	1639958	3.96383	3.94131	7.47364	15.3788	Putative sRNA
1691777	13	273	1692105	3.01306	3.50743	7.8268	14.3473	Putative sRNA
1693881	15	174	1694112	2.30619	5.00866	7.18726	14.5021	Putative sRNA
1711849	17	345	1712253	2.57379	4.16136	7.82346	14.5586	Putative sRNA
1712074	12	125	1712253	2.52551	4.42087	7.82346	14.7698	Putative sRNA
1714886	13	213	1715154	4.71722	2.91965	6.72969	14.3666	Putative sRNA
1714975	12	125	1715154	4.18314	6.03031	6.72969	16.9431	Putative sRNA
1720851	16	349	1721258	2.94218	4.52908	6.81756	14.2888	T-Box
1721162	14	216	1721434	3.16148	2.52761	8.47467	14.1638	T-Box
1730293	18	319	1730672	4.98548	6.03031	6.69985	17.7156	Putative sRNA
1737990	12	123	1738167	2.79376	5.00866	6.3634	14.1658	Putative sRNA
1754257	12	127	1754438	3.16148	3.76694	7.52342	14.4518	Putative sRNA
1763521	17	279	1763859	3.37605	4.52908	6.64963	14.5548	Putative sRNA
1767863	18	69	1767992	2.30619	6.03031	8.48516	16.8217	Putative sRNA
1768065	12	204	1768323	3.37605	6.03031	5.48068	14.887	ydaO_yuaA
1768934	18	192	1769186	2.94218	6.03031	6.90642	15.8789	Putative sRNA
1774033	17	339	1774431	2.20597	4.42087	8.16689	14.7937	Putative sRNA
1774240	12	137	1774431	2.79376	6.03031	8.16689	16.991	Putative sRNA
1841182	16	116	1841356	3.96383	5.37638	7.10165	16.4419	Putative sRNA
1849860	13	250	1850165	2.13983	6.03031	6.61561	14.7858	T-Box
1850203	16	249	1850510	3.32784	6.03031	7.94333	17.3015	T-Box
1872882	17	142	1873083	3.69557	3.37495	7.46309	14.5336	Putative sRNA
1880283	13	243	1880581	3.96383	4.59522	6.49296	15.052	Putative sRNA
1905958	17	164	1906181	3.69557	4.02883	6.50052	14.2249	Putative sRNA
1906299	13	110	1906464	3.96383	4.42087	6.62199	15.0067	Putative sRNA
1906411	18	280	1906751	2.35439	5.37638	6.95003	14.6808	Putative sRNA
1928411	16	334	1928803	3.69557	6.03031	5.59143	15.3173	Putative sRNA
1938189	14	65	1938310	3.81541	5.18301	5.05761	14.056	Putative sRNA
1981338	14	195	1981589	3.96383	4.52908	5.81689	14.3098	Putative sRNA
1990298	13	123	1990476	2.94218	6.03031	6.31176	15.2843	Putative sRNA
2020108	12	321	2020483	3.32784	3.94131	7.66591	14.9351	Putative sRNA
2020264	12	165	2020483	4.98548	2.98579	7.66591	15.6372	Putative sRNA
2020560	12	172	2020786	2.89322	4.42087	7.47345	14.7875	Putative sRNA
2024269	15	226	2024552	3.37605	2.41939	5.4063	11.2017	T-Box
2032584	18	252	2032896	4.98548	4.42087	5.86009	15.2664	Putative sRNA
2039131	16	212	2039401	3.96383	3.50743	5.93041	13.4017	T-Box
2047012	18	349	2047421	3.32784	5.18301	8.84958	17.3604	Putative sRNA
2068949	17	261	2069269	4.98548	5.18301	4.7033	14.8718	T-Box
2081858	17	50	2081967	2.42528	5.18301	7.48169	15.09	Putative sRNA
2140774	17	279	2141112	2.94218	3.18153	8.02805	14.1518	Putative sRNA
2157375	17	66	2157500	2.79376	6.03031	7.70351	16.5276	Putative sRNA
2170966	15	46	2171069	3.96383	3.94135	7.40614	15.3113	Putative sRNA
2177166	16	139	2177363	4.71722	5.37638	5.0296	15.1232	Putative sRNA
2224403	17	212	2224674	3.16148	3.94139	7.38976	14.4926	Putative sRNA
2234167	16	300	2234525	3.69557	3.57357	8.46713	15.7363	Putative sRNA
2241830	12	302	2242186	3.96383	5.37638	4.68782	14.028	Putative sRNA
2264231	12	149	2264434	3.10778	6.03031	8.15945	17.2975	Putative sRNA
2281631	13	206	2281892	3.16148	6.03031	5.32715	14.5189	Putative sRNA
2282594	13	129	2282778	2.94218	6.03031	6.45262	15.4251	Putative sRNA
2298793	16	191	2299042	3.96383	5.00866	8.38281	17.3553	Putative sRNA
2299059	18	321	2299440	2.74006	5.37638	6.05034	14.1668	Putative sRNA
2304862	12	191	2305107	4.98548	3.37497	5.77186	14.1323	Putative sRNA
2328128	16	181	2328367	2.20597	6.03031	6.44281	14.6791	Putative sRNA
2332680	13	131	2332866	4.98548	3.37499	5.98916	14.3496	Putative sRNA
2342935	15	296	2343288	3.54715	4.52908	5.97926	14.0555	Putative sRNA
2347800	12	161	2348015	3.37605	5.18301	6.55555	15.1146	Putative sRNA
2396989	14	254	2397299	3.96383	6.03031	4.54534	14.5395	Putative sRNA
2412064	18	179	2412303	2.94218	4.02883	7.97392	14.9449	Putative sRNA
2414143	12	259	2414456	3.96383	3.37493	6.98359	14.3223	Putative sRNA
2426643	12	263	2426960	3.69557	3.76694	7.46443	14.9269	Putative sRNA
2433540	16	166	2433764	4.98548	4.42087	5.2628	14.6691	THI
2459305	12	170	2459529	2.20597	5.18301	4.12756	11.5165	SAM
2469687	15	273	2470017	3.96383	4.02883	9.23705	17.2297	T-Box
2494807	12	318	2495179	3.96383	6.03031	5.78862	15.7828	Putative sRNA
2498107	18	221	2498388	2.52559	5.00866	6.68924	14.2235	Putative sRNA
2498129	16	201	2498388	3.96383	4.59522	6.68924	15.2483	Putative sRNA
2507694	15	141	2507892	3.32784	5.37638	6.40548	15.1097	Putative sRNA
2512187	14	88	2512331	2.35439	6.03031	6.41873	14.8034	Putative sRNA
2522979	17	46	2523084	3.69557	2.41939	8.26261	14.3776	Putative sRNA
2529195	12	43	2529292	2.20597	6.03031	6.31192	14.5482	Putative sRNA
2529601	17	174	2529834	2.79376	6.03031	5.21358	14.0377	Putative sRNA
2554123	12	60	2554237	3.16148	5.00866	7.9346	16.1047	Putative sRNA
2586767	16	281	2587106	3.54715	6.03031	5.18623	14.7637	Putative sRNA
2614754	16	275	2615087	2.79376	4.35473	7.14478	14.2933	Putative sRNA
2614985	12	48	2615087	2.52549	5.00866	7.14478	14.6789	Putative sRNA
2615371	12	77	2615502	3.69557	4.42087	6.81872	14.9352	Putative sRNA
2616382	16	345	2616785	2.74006	5.18301	6.14378	14.0669	Putative sRNA
2647308	13	41	2647404	2.89322	5.37638	6.8176	15.0872	Putative sRNA
2653458	13	171	2653684	4.18314	3.94134	5.96238	14.0869	Putative sRNA
2686728	17	238	2687025	3.96383	5.18301	5.79363	14.9405	Putative sRNA
2716570	12	89	2716713	3.37605	3.94133	6.83836	14.1557	Putative sRNA
2719403	16	254	2719715	3.69557	5.37638	6.55211	15.6241	Putative sRNA
2741211	18	47	2741318	2.79376	6.03031	7.71309	16.5372	Putative sRNA
2761124	13	194	2761373	2.95936	4.42087	7.11821	14.4984	Putative sRNA
2777800	17	314	2778173	3.37605	4.42087	6.45329	14.2502	Putative sRNA
2833554	17	299	2833912	2.89322	4.59522	7.22319	14.7116	Lysine
2833713	18	139	2833912	3.37605	4.59522	7.22319	15.1945	Putative sRNA
2859679	17	301	2860039	2.35439	4.35473	8.23205	14.9412	Putative sRNA
2868562	13	53	2868670	4.18314	6.03031	5.82253	16.036	Putative sRNA
2874759	12	330	2875143	3.22762	5.18301	5.88071	14.2913	Putative sRNA
2875191	16	336	2875585	2.94218	5.18301	6.12094	14.2461	Putative sRNA
2893695	13	62	2893812	3.76171	5.18301	6.36517	15.3099	Putative sRNA
2899458	16	189	2899705	3.32784	6.03031	5.19792	14.5561	Putative sRNA
2920995	12	101	2921150	3.69557	3.76694	6.8404	14.3029	Putative sRNA
2922300	14	99	2922455	2.89322	4.42087	8.64291	15.957	Putative sRNA
2936206	12	61	2936321	3.16148	6.03031	5.18791	14.3797	Putative sRNA
2939352	12	98	2939504	3.32784	6.03031	5.18746	14.5456	Putative sRNA
2978390	16	178	2978626	3.16148	3.57357	7.2902	14.0253	Putative sRNA
2978797	13	290	2979142	3.16148	6.03031	5.36792	14.5597	Putative sRNA
3022566	12	247	3022867	3.96383	4.52908	6.33943	14.8323	Putative sRNA
3023052	16	60	3023170	2.94218	5.18301	6.66284	14.788	Putative sRNA
3023331	13	245	3023631	3.16148	4.42087	8.65604	16.2384	Putative sRNA
3023537	12	40	3023631	2.79376	5.37638	8.65604	16.8262	Putative sRNA
3030401	16	197	3030656	3.10778	4.16136	7.45323	14.7224	Putative sRNA
3034430	12	269	3034753	4.71722	4.42087	6.52072	15.6588	Putative sRNA
3034628	16	67	3034753	3.96383	4.59522	6.52072	15.0798	Putative sRNA
3034859	18	211	3035130	2.89322	6.03031	5.65244	14.576	Putative sRNA
3038725	12	323	3039102	2.67391	6.03031	6.05251	14.7567	Putative sRNA
3046490	18	120	3046670	3.96383	5.37638	5.18796	14.5282	Putative sRNA
3052907	16	110	3053075	3.32784	4.42087	7.00858	14.7573	Putative sRNA
3060204	12	92	3060350	3.81541	6.03031	9.20608	19.0518	Putative sRNA
3069365	13	88	3069508	3.69557	2.31673	9.28819	15.3005	Putative sRNA
3081443	12	336	3081833	2.35439	3.37495	9.53429	15.2636	Putative sRNA
3081718	12	61	3081833	2.13983	2.41939	9.53429	14.0935	Putative sRNA
3107503	17	163	3107725	3.96383	6.03031	6.18958	16.1837	Putative sRNA
3124203	14	200	3124459	2.94218	5.18301	6.18511	14.3103	Putative sRNA
3129657	17	73	3129789	3.96383	4.59522	5.78876	14.3478	Putative sRNA
3136856	17	62	3136977	4.34949	4.59522	5.18071	14.1254	ydaO_yuaA
3147273	16	334	3147665	3.54715	4.52908	6.63257	14.7088	Putative sRNA
3172516	12	71	3172641	3.32784	6.03031	6.6832	16.0413	Putative sRNA
3172799	15	236	3173092	2.52555	5.37638	8.50068	16.4026	Putative sRNA
3179669	15	57	3179783	3.37605	4.16136	6.57192	14.1093	Putative sRNA
3207104	17	201	3207364	2.79376	6.03031	5.44668	14.2708	Putative sRNA
3207201	15	106	3207364	4.98548	3.76694	5.44668	14.1991	Putative sRNA
3210163	16	97	3210318	3.96383	4.16136	6.23931	14.3645	Putative sRNA
3212624	16	347	3213029	2.57377	5.37638	7.3263	15.2765	Putative sRNA
3226354	18	227	3226641	3.96383	6.03031	4.41372	14.4079	Putative sRNA
3226998	16	189	3227245	3.37605	5.37638	5.49994	14.2524	Putative sRNA
3232894	16	136	3233088	3.22762	5.37638	6.11121	14.7152	Putative sRNA
3270311	12	208	3270573	3.32784	6.03031	5.00048	14.3586	Putative sRNA
3291538	12	55	3291647	3.32784	5.18301	7.18841	15.6993	Putative sRNA
3292493	15	87	3292637	2.94218	4.42087	7.10909	14.4721	Putative sRNA
3354021	16	249	3354328	3.16148	5.37638	7.55672	16.0946	Putative sRNA
3458902	18	51	3459013	3.16148	6.03031	7.10799	16.2998	Putative sRNA
3459090	16	74	3459222	2.74006	4.42087	7.00438	14.1653	Putative sRNA
3481155	17	293	3481507	3.96383	6.03031	4.16935	14.1635	Putative sRNA
3483150	14	71	3483277	3.96383	6.03031	7.17238	17.1665	Putative sRNA
3495660	14	276	3495992	2.94218	4.42087	9.57557	16.9386	Putative sRNA
3534341	16	318	3534717	3.37605	6.03031	5.07927	14.4856	Putative sRNA
3575006	13	149	3575210	2.57377	4.02883	7.53492	14.1375	Putative sRNA
3595448	13	346	3595849	2.94218	6.03031	5.38382	14.3563	Putative sRNA
3607956	15	50	3608063	3.16148	3.94135	7.27134	14.3742	Putative sRNA
3745659	12	155	3745868	3.91487	3.94138	6.91857	14.7748	Putative sRNA
3776908	13	277	3777240	2.74006	5.18301	8.80562	16.7287	Putative sRNA
3777229	16	255	3777542	2.94218	6.03031	7.33654	16.309	Putative sRNA
3778166	12	81	3778301	2.35439	5.00866	6.93667	14.2997	Putative sRNA
3787082	12	68	3787204	2.13983	5.18301	7.98192	15.3048	Putative sRNA
3795467	15	200	3795724	3.69557	4.42087	9.13524	17.2517	Putative sRNA
3807699	13	118	3807872	2.20597	6.03031	8.11695	16.3532	Putative sRNA
3825918	14	53	3826027	3.16148	6.03031	5.96435	15.1561	Putative sRNA
3832407	12	202	3832663	3.16148	5.00866	7.30155	15.4717	Putative sRNA
3832591	12	339	3832984	3.32784	4.42087	8.30517	16.0539	Putative sRNA
3834460	18	65	3834585	4.18314	4.59522	5.74528	14.5236	Putative sRNA
3834768	17	93	3834920	3.16148	4.42087	6.47602	14.0584	Putative sRNA
3859164	18	265	3859489	3.81541	4.42087	5.99046	14.2267	Cobalamin
3953787	15	208	3954052	3.54715	4.59522	4.55931	12.7017	FMN
3954042	12	233	3954329	2.94218	3.37491	8.38122	14.6983	Putative sRNA
3964649	13	246	3964950	4.98548	4.42087	6.49308	15.8994	T-Box
3983368	18	333	3983761	3.81541	5.18301	6.35595	15.3544	Putative sRNA
3987487	17	127	3987673	3.91487	5.00866	5.20267	14.1262	Putative sRNA
4020945	15	116	4021118	3.16148	6.03031	6.11857	15.3104	Putative sRNA
4037514	17	118	4037691	3.96383	2.52761	8.16543	14.6569	Putative sRNA
4047902	18	56	4048018	3.96383	6.03031	4.71494	14.7091	Putative sRNA
4062895	18	282	4063237	3.96383	6.03031	6.37528	16.3694	Putative sRNA
4074130	14	259	4074445	3.96383	4.02883	9.05613	17.0488	SAM
4077378	12	86	4077518	3.96383	4.42087	5.80376	14.1885	Putative sRNA
4150650	17	336	4151045	2.35439	6.03031	5.97738	14.3621	Putative sRNA
4166047	18	274	4166381	4.98548	6.03031	4.87388	15.8897	T-Box
4166551	12	40	4166645	3.37605	2.15988	5.53742	11.0733	T-Box
4195458	17	95	4195612	4.18314	5.37638	6.01035	15.5699	Putative sRNA
4285419	15	240	4285716	3.16148	6.03031	5.20285	14.3946	Putative sRNA
4307502	17	291	4307852	2.20597	6.03031	7.41355	15.6498	Putative sRNA
4307756	12	42	4307852	2.30619	5.00866	7.41355	14.7284	Putative sRNA
4356181	13	326	4356562	3.96383	4.42087	7.53846	15.9232	Putative sRNA
4381314	15	109	4381480	2.89322	5.37638	7.61381	15.8834	Putative sRNA
4425572	14	67	4425695	2.20597	4.02883	9.01476	15.2496	Putative sRNA
4468517	17	346	4468922	3.96383	4.02883	6.42304	14.4157	Putative sRNA
4501247	16	82	4501387	3.22762	4.35473	7.59329	15.1756	Putative sRNA
4505892	12	144	4506090	2.94218	5.37638	6.54166	14.8602	Putative sRNA
4589324	17	208	4589591	3.96383	3.00718	5.741	12.712	TPP
4614356	15	297	4614710	2.94218	5.37638	6.42405	14.7426	Putative sRNA
4614534	15	119	4614710	2.30619	5.37638	6.42405	14.1066	Putative sRNA
4647585	14	265	4647906	3.16148	4.42087	6.44242	14.0248	Putative sRNA
4649370	16	79	4649507	3.96383	5.37638	5.83292	15.1731	Putative sRNA
4649561	15	157	4649775	2.35439	6.03031	5.81239	14.1971	Putative sRNA
4656987	12	82	4657123	3.32784	5.37638	5.48049	14.1847	Putative sRNA
4687232	12	40	4687326	4.98548	3.50743	8.07068	16.5636	Putative sRNA
4687316	12	349	4687719	2.13983	4.52908	7.6187	14.2876	Putative sRNA
4688222	15	190	4688469	3.76171	3.18153	7.08461	14.0279	Putative sRNA
4689701	16	340	4690099	2.20597	6.03031	7.49753	15.7338	Putative sRNA
4690583	14	259	4690898	3.96383	3.50743	6.89099	14.3622	Putative sRNA
4691271	16	73	4691402	3.96383	3.50743	7.0105	14.4818	Putative sRNA
4691813	18	149	4692022	2.89322	6.03031	5.89061	14.8141	Putative sRNA
4718689	16	182	4718929	2.74006	6.03031	6.67355	15.4439	Putative sRNA
4741321	14	320	4741697	3.16148	3.94135	7.24495	14.3478	Putative sRNA
4742578	14	155	4742789	3.16148	5.37638	5.53187	14.0697	Putative sRNA
4778962	17	44	4779065	2.94218	6.03031	6.13867	15.1112	Putative sRNA
4789473	15	65	4789595	4.98548	3.94139	7.23057	16.1574	Putative sRNA
4798216	12	218	4798488	4.98548	4.42087	6.03921	15.4456	Putative sRNA
4799011	16	77	4799146	4.18314	5.00866	5.19854	14.3903	Putative sRNA
4832990	14	240	4833286	3.10778	6.03031	6.03262	15.1707	Putative sRNA
4851953	15	303	4852313	2.30543	4.35473	9.50225	16.1624	Putative sRNA
4852149	13	109	4852313	3.96383	5.00866	9.50225	18.4747	Putative sRNA
4897241	18	159	4897460	4.98548	5.00866	4.27501	14.2691	Putative sRNA
4933611	12	80	4933745	3.37605	3.76694	7.04312	14.1861	Putative sRNA
4945006	12	282	4945342	2.95936	4.52908	7.73597	15.2244	Putative sRNA
4956954	12	71	4957079	3.96383	6.03031	5.04807	15.0422	Putative sRNA
4959308	18	252	4959620	2.94218	4.59522	6.76047	14.2979	Putative sRNA
4973898	12	62	4974014	2.67391	5.18301	7.84744	15.7044	Putative sRNA
4979753	18	324	4980137	3.37605	6.03031	7.06858	16.4749	Putative sRNA
4995662	14	127	4995845	2.79376	5.37638	6.87044	15.0406	Putative sRNA
5017804	15	57	5017918	2.67391	4.52908	6.93838	14.1414	Putative sRNA
5082062	16	44	5082164	3.16148	5.00866	7.42764	15.5978	Putative sRNA
5095129	14	252	5095437	2.74006	4.02883	7.39112	14.16	Putative sRNA
5099354	14	50	5099460	3.96383	5.37638	4.94716	14.2874	Putative sRNA
5104702	12	73	5104829	3.16148	4.42087	6.97072	14.5531	Putative sRNA
5145889	14	49	5145994	3.96383	4.59522	6.1731	14.7322	Putative sRNA
5156923	13	83	5157061	2.52558	5.37638	7.32631	15.2283	Putative sRNA
5169050	16	70	5169178	4.98548	4.42087	7.75601	17.1624	Putative sRNA
5206943	16	134	5207135	4.71722	4.42087	5.58583	14.7239	Putative sRNA
-----------------------------------------------------------------
Start1 - Start of the Promoter [-35] box
D1 - Spacer between [-35] & [-10] boxes
D2-Predicted length of sRNA transcript-encoding region
End3 - End of Terminator
Sum of scores value for PWM1 [-35 box]
Sum of scores value for PWM2 [-10 box]
Sum of scores value for PWM3 [rho-independent terminator]
CSS - Cumulative sum of scores
-----------------------------------------------------------------

## Sheet: Sheet2
Sheet 2: Bacillus anthracis 'Ames' (AE016879.fna) 37 known and 261 'novel' sRNAs in negative strand
Start1	D1	D2	End3	Score1	Score2	Score3	CSS	Strand	Comment
14548	14	114	14379	2.89322	5.00866	7.35539	15.2573	c	Putative sRNA
96754	12	48	96653	3.96383	3.57357	7.25526	14.7927	c	Putative sRNA
99144	15	268	98820	2.94218	5.18301	5.97225	14.0974	c	Putative sRNA
120690	13	66	120570	2.52553	5.37638	6.36607	14.268	c	Putative sRNA
163496	14	61	163380	3.96383	6.03031	4.80681	14.801	c	Putative sRNA
177332	17	159	177115	4.98548	4.35473	6.74466	16.0849	c	SAM/S_box
197264	17	211	196995	4.98548	2.81143	4.04744	11.8444	c	SAM/S_box
232135	13	146	231935	4.71722	2.98579	6.31923	14.0222	c	Putative sRNA
254243	14	231	253957	4.98548	6.03031	4.35884	15.3746	c	Putative sRNA
276030	14	134	275841	2.94218	6.03031	5.64138	14.6139	c	Putative sRNA
342394	12	177	342164	3.76171	2.91965	6.39908	13.0804	c	Purine
371223	12	215	370955	2.30619	3.94133	4.7933	11.0408	c	SAM/S_box
449016	17	173	448785	4.71722	3.76694	5.53717	14.0213	c	Putative sRNA
449770	13	55	449661	3.16148	4.42087	6.65038	14.2327	c	Putative sRNA
494147	14	146	493946	3.96383	5.18301	6.21667	15.3635	c	Putative sRNA
509613	13	150	509409	4.34949	3.39922	7.7025	15.4512	c	Putative sRNA
616158	18	52	616047	2.94218	6.03031	5.88133	14.8538	c	Putative sRNA
627130	13	348	626728	2.52557	4.59522	7.75334	14.8741	c	Putative sRNA
646005	17	320	645627	4.18314	5.37638	6.31535	15.8749	c	Putative sRNA
672446	13	189	672203	3.32784	3.94139	6.9077	14.1769	c	Putative sRNA
679913	17	72	679783	3.96383	6.03031	5.8774	15.8715	c	Putative sRNA
826592	14	54	826483	2.89322	6.03031	6.22138	15.1449	c	Putative sRNA
855554	13	306	855194	2.67391	6.03031	5.80488	14.5091	c	Lysine
859714	12	289	859372	3.96383	5.00866	6.32987	15.3024	c	Putative sRNA
925913	13	107	925752	3.16148	6.03031	5.05136	14.2431	c	Putative sRNA
955326	13	274	954998	3.01306	5.18301	5.91492	14.111	c	Putative sRNA
962183	18	87	962037	3.54715	6.03031	6.11307	15.6905	c	Putative sRNA
977827	14	326	977446	2.13983	6.03031	6.76031	14.9305	c	Putative sRNA
978208	16	103	978048	2.59164	4.42087	8.92164	15.9342	c	Putative sRNA
978453	17	347	978048	3.16148	2.98579	8.92164	15.0689	c	Putative sRNA
994612	12	83	994476	2.94218	5.18301	7.04185	15.167	c	Putative sRNA
1000008	18	309	999640	4.34949	5.37638	5.15959	14.8855	c	Putative sRNA
1010760	14	51	1010654	3.96383	6.03031	4.43106	14.4252	c	Putative sRNA
1019284	17	308	1018918	2.89322	5.00866	6.37053	14.2724	c	Putative sRNA
1019556	13	49	1019453	2.74006	5.18301	7.26735	15.1904	c	Putative sRNA
1041551	12	103	1041395	3.69557	3.57357	7.89869	15.1678	c	Putative sRNA
1041712	17	259	1041395	2.89322	5.18301	7.89869	15.9749	c	Putative sRNA
1045738	12	57	1045628	2.13983	6.03031	6.18252	14.3527	c	Putative sRNA
1087767	16	269	1087441	3.91487	4.02883	6.06526	14.009	c	Putative sRNA
1088074	17	44	1087972	2.79376	4.59522	7.65153	15.0405	c	Putative sRNA
1092693	18	290	1092344	3.96383	5.18301	5.48085	14.6277	c	Putative sRNA
1152665	17	277	1152330	2.20597	2.52761	8.69378	13.4274	c	T-Box
1163158	18	217	1162882	3.16148	5.18301	6.6435	14.988	c	Putative sRNA
1228148	16	188	1227903	3.96383	5.18301	6.1865	15.3333	c	Putative sRNA
1232299	18	133	1232107	2.35439	5.18301	6.62059	14.158	c	Putative sRNA
1232624	17	233	1232333	2.57378	6.03031	7.05121	15.6553	c	Putative sRNA
1237575	16	71	1237447	3.16148	6.03031	6.42963	15.6214	c	Putative sRNA
1238520	16	158	1238305	4.71722	3.57357	6.49658	14.7874	c	Putative sRNA
1240148	17	270	1239820	3.37605	6.03031	5.54865	14.955	c	Putative sRNA
1252481	14	72	1252354	2.35439	6.03031	7.11935	15.504	c	Putative sRNA
1252727	16	316	1252354	3.37605	4.02883	7.11935	14.5242	c	Putative sRNA
1269192	12	123	1269016	2.89322	5.00866	6.15267	14.0546	c	yybP_ykoY
1292053	16	134	1291862	3.96383	5.00866	5.67685	14.6493	c	Putative sRNA
1292462	18	92	1292311	2.89322	5.18301	6.96416	15.0404	c	Putative sRNA
1298744	15	108	1298580	4.98548	4.52908	5.05842	14.573	c	Putative sRNA
1324556	12	58	1324445	3.91487	5.18301	5.65318	14.7511	c	Putative sRNA
1331907	15	54	1331797	4.98548	3.18153	6.16164	14.3286	c	Putative sRNA
1335007	17	305	1334644	3.01306	6.03031	6.67831	15.7217	c	Putative sRNA
1354624	15	174	1354394	2.89322	6.03031	7.65781	16.5813	c	Putative sRNA
1354707	14	258	1354394	3.37605	4.42087	7.65781	15.4547	c	Putative sRNA
1371580	13	62	1371464	3.17942	4.59522	7.75691	15.5315	c	Putative sRNA
1382647	18	86	1382502	2.15701	2.81143	4.55113	9.51957	c	T-Box
1389750	14	128	1389567	2.79376	6.03031	5.76137	14.5854	c	Putative sRNA
1396984	16	234	1396693	3.96383	6.03031	5.59186	15.586	c	Putative sRNA
1397409	15	59	1397294	2.35439	6.03031	6.05024	14.4349	c	Putative sRNA
1423899	17	334	1423507	3.37605	5.00866	6.56047	14.9452	c	Putative sRNA
1496381	15	56	1496269	2.79376	4.59522	6.90357	14.2926	c	Putative sRNA
1496588	14	264	1496269	2.79376	5.18301	6.90357	14.8803	c	Putative sRNA
1513388	16	195	1513136	3.16148	4.42087	6.8747	14.4571	c	Putative sRNA
1521232	12	45	1521134	2.52558	6.03031	6.1684	14.7243	c	Putative sRNA
1570584	12	221	1570310	3.10778	6.03031	4.89573	14.0338	c	Putative sRNA
1588111	12	44	1588014	3.96383	4.52908	5.55276	14.0457	c	Putative sRNA
1595821	13	111	1595656	2.05755	6.03031	7.37626	15.4641	c	Putative sRNA
1595921	14	210	1595656	3.37605	3.76694	7.37626	14.5192	c	Putative sRNA
1600526	14	200	1600271	3.96383	4.02883	8.29599	16.2887	c	Putative sRNA
1600708	17	127	1600523	2.57377	5.18301	6.57145	14.3282	c	Putative sRNA
1622187	12	187	1621947	2.89322	5.00866	6.50532	14.4072	c	Putative sRNA
1681201	18	118	1681024	3.96383	6.03031	7.30795	17.3021	c	Putative sRNA
1696908	17	327	1696523	3.32784	5.37638	6.88453	15.5887	c	Lysine
1715383	18	51	1715273	2.59164	5.18301	6.8327	14.6074	c	Putative sRNA
1728686	18	301	1728326	2.13983	5.00866	7.23798	14.3865	c	Putative sRNA
1751881	12	339	1751489	4.34949	3.94135	6.72876	15.0196	c	Putative sRNA
1753422	12	328	1753041	2.94218	4.59522	6.8157	14.3531	c	Putative sRNA
1753694	12	91	1753550	2.52549	6.03031	6.3618	14.9176	c	Putative sRNA
1773749	17	167	1773524	3.69557	5.37638	4.94127	14.0132	c	Putative sRNA
1774282	13	69	1774159	2.74006	5.37638	7.83381	15.9503	c	Putative sRNA
1781208	17	346	1780804	4.98548	5.00866	6.4099	16.404	c	Putative sRNA
1796570	15	74	1796440	3.96383	4.35473	6.35106	14.6696	c	Putative sRNA
1796586	16	89	1796440	3.10778	6.03031	6.35106	15.4892	c	Putative sRNA
1838149	12	111	1837985	3.96383	4.42087	5.91289	14.2976	c	Putative sRNA
1841481	16	191	1841233	2.79376	6.03031	6.21832	15.0424	c	Putative sRNA
1864673	12	61	1864559	2.74006	6.03031	7.80164	16.572	c	Putative sRNA
1886524	16	99	1886368	2.30619	2.91965	9.57479	14.8006	c	Putative sRNA
1906514	17	234	1906222	3.16148	6.03031	5.88914	15.0809	c	Putative sRNA
1908763	12	54	1908656	3.96383	3.57357	7.64647	15.1839	c	Putative sRNA
1909059	16	346	1908656	2.89322	4.42087	7.64647	14.9606	c	Putative sRNA
1974803	13	256	1974493	3.22762	5.37638	6.36053	14.9645	c	Putative sRNA
1997381	13	91	1997236	3.96383	4.59522	7.6391	16.1981	c	Putative sRNA
2038912	13	239	2038619	4.71722	4.35473	5.28072	14.3527	c	Putative sRNA
2061221	14	78	2061088	3.37605	2.98579	8.61876	14.9806	c	Putative sRNA
2082076	16	202	2081817	2.94218	5.37638	7.19264	15.5112	c	Putative sRNA
2105547	14	132	2105360	3.96383	4.42087	6.58986	14.9746	c	Putative sRNA
2115693	18	101	2115533	2.30619	4.59522	9.32453	16.2259	c	Putative sRNA
2115887	16	297	2115533	2.74006	5.18301	9.32453	17.2476	c	Putative sRNA
2116626	13	143	2116429	3.96383	2.41939	7.93247	14.3157	c	Putative sRNA
2118597	16	232	2118308	3.96383	3.57357	6.82942	14.3668	c	Putative sRNA
2119260	17	323	2118879	3.96383	4.02883	6.42297	14.4156	c	Putative sRNA
2166189	17	278	2165853	2.79376	5.37638	7.85031	16.0205	c	Putative sRNA
2166230	15	321	2165853	2.79376	4.59522	7.85031	15.2393	c	Putative sRNA
2171321	12	124	2171144	2.79376	4.02883	7.44978	14.2724	c	Putative sRNA
2171638	14	154	2171429	2.30619	6.03031	7.69971	16.0362	c	Putative sRNA
2182265	16	196	2182012	2.35439	6.03031	5.69818	14.0829	c	Putative sRNA
2198029	16	296	2197676	3.96383	6.03031	6.44838	16.4425	c	Putative sRNA
2221769	13	255	2221460	2.30619	3.00718	7.506	12.8194	c	Glycine
2224452	15	63	2224333	3.76171	4.42087	6.20813	14.3907	c	Putative sRNA
2227451	18	198	2227194	4.98548	3.37497	7.40668	15.7671	c	Putative sRNA
2227757	15	212	2227489	3.96383	4.42087	6.84551	15.2302	c	Putative sRNA
2234838	15	74	2234708	3.54715	3.94135	6.6379	14.1264	c	Putative sRNA
2257327	16	349	2256921	3.96383	5.37638	5.52485	14.8651	c	Putative sRNA
2272910	15	51	2272803	2.57376	5.37638	6.98719	14.9373	c	Putative sRNA
2279326	17	41	2279227	4.98548	2.52761	6.51989	14.033	c	Putative sRNA
2281983	18	202	2281722	2.20597	6.03031	5.79797	14.0343	c	Putative sRNA
2299244	16	81	2299106	4.71722	6.03031	5.93546	16.683	c	Putative sRNA
2304006	16	45	2303904	2.94218	4.52908	8.27874	15.75	c	Putative sRNA
2305021	12	143	2304825	3.16148	4.52908	7.3382	15.0288	c	Putative sRNA
2326700	18	92	2326549	3.96383	4.02883	7.46818	15.4608	c	Putative sRNA
2344284	18	106	2344119	3.16148	4.02883	7.02643	14.2167	c	Putative sRNA
2345356	17	130	2345168	2.52559	6.03031	6.89126	15.4472	c	Putative sRNA
2352757	16	108	2352592	2.42528	5.37638	6.7407	14.5424	c	Putative sRNA
2389314	17	312	2388944	3.32784	4.02883	8.66367	16.0203	c	Putative sRNA
2423530	13	108	2423368	2.13983	6.03031	6.24201	14.4122	c	Putative sRNA
2426591	16	185	2426349	2.74006	5.18301	6.67069	14.5938	c	Putative sRNA
2426681	17	274	2426349	3.10778	4.42087	6.67069	14.1993	c	Putative sRNA
2433783	16	151	2433575	2.89322	6.03031	5.26379	14.1873	c	Putative sRNA
2435689	18	316	2435314	2.20597	6.03031	6.0748	14.3111	c	Putative sRNA
2438028	13	182	2437792	3.16148	5.00866	6.79834	14.9685	c	Putative sRNA
2438054	12	209	2437792	2.79376	4.52908	6.79834	14.1212	c	Putative sRNA
2443092	18	325	2442708	2.13983	6.03031	6.47516	14.6453	c	Putative sRNA
2482342	14	88	2482199	2.74006	5.37638	7.03119	15.1476	c	Putative sRNA
2486175	17	215	2485902	2.95936	6.03031	7.94069	16.9304	c	Putative sRNA
2499219	15	200	2498963	3.32784	4.59522	6.36052	14.2836	c	Putative sRNA
2516954	17	275	2516621	3.16148	4.52908	7.46281	15.1534	c	Putative sRNA
2517257	17	212	2516987	3.37605	5.18301	7.31123	15.8703	c	Putative sRNA
2529311	15	46	2529209	3.10778	6.03031	6.0809	15.219	c	Putative sRNA
2546168	17	46	2546064	2.79376	5.18301	7.15708	15.1339	c	Putative sRNA
2548960	12	240	2548667	4.98548	3.57357	6.25757	14.8166	c	Putative sRNA
2614927	17	64	2614805	3.37605	2.35325	9.42143	15.1507	c	Putative sRNA
2615042	14	182	2614805	2.89322	4.42087	9.42143	16.7355	c	Putative sRNA
2616607	18	129	2616419	2.35439	6.03031	5.70632	14.091	c	Putative sRNA
2645433	17	165	2645210	3.96383	2.59375	7.92099	14.4786	c	Putative sRNA
2648002	16	114	2647831	2.30543	6.03031	5.79848	14.1342	c	Putative sRNA
2694785	15	57	2694672	4.34949	6.03031	6.7402	17.12	c	Putative sRNA
2717069	14	132	2716882	2.95936	5.18301	6.08065	14.223	c	Putative sRNA
2728839	16	261	2728521	2.30619	3.94131	5.40033	11.6478	c	T-Box
2729149	18	281	2728809	4.98548	6.03031	3.65399	14.6698	c	T-Box
2761403	18	204	2761140	4.98548	2.41939	6.47375	13.8786	c	T-Box
2761549	18	350	2761140	3.22762	6.03031	6.47375	15.7317	c	Putative sRNA
2778407	12	192	2778162	3.96383	6.03031	4.17917	14.1733	c	Putative sRNA
2798486	17	42	2798386	3.16148	6.03031	5.66973	14.8615	c	Putative sRNA
2856580	18	62	2856459	3.10778	5.18301	5.7511	14.0419	c	Putative sRNA
2875451	12	298	2875100	3.32784	4.59522	6.31472	14.2378	c	Putative sRNA
2895763	17	215	2895490	2.20597	5.37638	6.59206	14.1744	c	Putative sRNA
2897976	18	338	2897579	3.91487	4.42087	7.04048	15.3762	c	Putative sRNA
2900400	13	220	2900126	3.37605	4.52908	7.58622	15.4914	c	Putative sRNA
2902171	12	94	2902024	2.30543	5.37638	8.27336	15.9552	c	Putative sRNA
2903809	13	171	2903584	2.30619	6.03031	6.51951	14.856	c	Putative sRNA
2916285	18	154	2916072	3.37605	3.50743	8.06743	14.9509	c	Putative sRNA
2919644	17	62	2919524	4.98548	6.03031	3.82747	14.8433	c	Putative sRNA
2932032	16	96	2931879	2.94218	5.37638	7.25729	15.5759	c	Putative sRNA
2953285	17	170	2953057	4.34949	4.42087	4.41251	13.1829	c	SAM/S_box
2958090	14	150	2957885	3.16148	5.18301	6.50041	14.8449	c	Putative sRNA
2965387	15	54	2965277	4.98548	6.03031	4.24933	15.2651	c	Putative sRNA
2976573	15	287	2976230	3.81541	6.03031	9.00727	18.853	c	Putative sRNA
2993677	12	43	2993581	4.98548	3.57357	6.55983	15.1189	c	Putative sRNA
2997602	16	80	2997465	2.74006	5.37638	6.08726	14.2037	c	Putative sRNA
3022987	12	40	3022894	3.96383	5.37638	5.86777	15.208	c	Putative sRNA
3060388	18	45	3060284	4.71722	6.03031	3.87859	14.6261	c	Putative sRNA
3062663	16	132	3062474	3.96383	3.57357	6.62202	14.1594	c	Putative sRNA
3065810	18	82	3065669	4.98548	5.00866	4.69058	14.6847	c	Putative sRNA
3071754	18	62	3071633	2.67391	3.94138	8.54252	15.1578	c	Putative sRNA
3091724	17	135	3091531	4.98548	5.18301	9.24	19.4085	c	SAM/S_box
3133577	17	257	3133262	2.15227	4.42087	6.76157	13.3347	c	T-Box
3136354	18	337	3135958	4.98548	6.03031	4.42717	15.443	c	Putative sRNA
3147741	18	266	3147416	2.20597	6.03031	6.50957	14.7459	c	Putative sRNA
3163534	12	288	3163193	2.52549	6.03031	6.06664	14.6224	c	Putative sRNA
3167761	18	43	3167659	3.96383	6.03031	5.66519	15.6593	c	Putative sRNA
3167787	12	75	3167659	2.79376	6.03031	5.66519	14.4893	c	Putative sRNA
3170307	15	128	3170123	4.98548	6.03031	3.4488	14.4646	c	Putative sRNA
3172680	15	85	3172539	2.74006	5.18301	6.18465	14.1077	c	Putative sRNA
3207144	13	167	3206923	3.22762	6.03031	5.74553	15.0035	c	Putative sRNA
3208584	15	292	3208236	3.76171	5.18301	8.59297	17.5377	c	Putative sRNA
3229416	14	146	3229215	3.32784	4.59522	6.10159	14.0246	c	Putative sRNA
3230921	18	54	3230808	2.20597	6.03031	6.05545	14.2917	c	Putative sRNA
3254445	12	292	3254100	3.32784	5.18301	6.05712	14.568	c	Putative sRNA
3257908	17	183	3257667	2.20597	6.03031	7.61214	15.8484	c	Putative sRNA
3270456	13	171	3270231	2.08613	6.03031	6.16901	14.2855	c	Putative sRNA
3299650	15	202	3299392	3.96383	4.42087	8.45853	16.8432	c	Putative sRNA
3404622	17	93	3404471	4.98548	6.03031	4.79034	15.8061	c	Putative sRNA
3409683	14	201	3409427	3.69557	5.00866	6.59423	15.2985	c	Putative sRNA
3456583	18	70	3456454	2.35439	4.59522	7.2405	14.1901	c	Putative sRNA
3456830	13	322	3456454	4.98548	3.00718	7.2405	15.2332	c	Putative sRNA
3459379	18	150	3459170	3.16148	3.94139	6.93904	14.0419	c	Putative sRNA
3481191	17	242	3480891	2.15777	6.03031	5.9154	14.1035	c	Putative sRNA
3481445	16	269	3481119	4.98548	4.02883	5.59504	14.6093	c	Putative sRNA
3494848	14	336	3494457	3.01306	4.02883	7.40051	14.4424	c	Putative sRNA
3506314	13	60	3506200	3.37605	5.18301	5.76092	14.32	c	Putative sRNA
3512437	13	105	3512278	2.52557	5.37638	7.28058	15.1825	c	Putative sRNA
3548022	16	79	3547886	2.94218	6.03031	6.09588	15.0684	c	Putative sRNA
3590032	17	170	3589804	4.98548	5.00866	5.0241	15.0182	c	Putative sRNA
3601432	14	322	3601055	3.96383	3.94133	6.45049	14.3557	c	Putative sRNA
3605468	14	50	3605363	2.94218	5.18301	6.30109	14.4263	c	Putative sRNA
3629342	17	196	3629088	3.69557	4.59522	9.56531	17.8561	c	Putative sRNA
3711391	17	194	3711139	4.71722	4.59522	6.81952	16.132	c	Putative sRNA
3716394	17	266	3716070	3.76171	6.03031	5.89663	15.6887	c	T-Box
3795775	12	237	3795485	2.89322	3.50743	8.00654	14.4072	c	ylbH
3812634	18	112	3812463	3.16148	5.18301	6.33112	14.6756	c	Putative sRNA
3844458	15	287	3844115	3.32784	5.18301	7.94679	16.4576	c	Putative sRNA
3846565	17	67	3846440	3.96383	4.59522	5.94544	14.5045	c	Putative sRNA
3890805	18	204	3890542	4.98548	5.18301	3.65518	13.8237	c	SAM/S_box
3896736	16	282	3896397	2.30619	6.03031	5.96767	14.3042	c	Putative sRNA
3899960	17	156	3899746	2.57378	6.03031	5.48067	14.0848	c	Putative sRNA
3969195	18	182	3968954	3.76171	4.42087	7.20704	15.3896	c	Putative sRNA
4055426	15	327	4055043	3.32784	6.03031	9.45014	18.8083	c	Putative sRNA
4074184	17	209	4073917	4.34949	2.98579	5.52191	12.8572	c	SAM/S_box
4082636	13	195	4082387	2.35439	5.18301	7.01417	14.5516	c	Putative sRNA
4094683	12	112	4094518	2.74006	6.03031	7.49137	16.2617	c	Putative sRNA
4094758	13	186	4094518	4.98548	3.57357	7.49137	16.0504	c	Putative sRNA
4104420	18	68	4104293	2.20597	5.18301	7.87121	15.2602	c	Putative sRNA
4153465	15	222	4153187	4.98548	6.03031	5.16771	16.1835	c	Putative sRNA
4154479	14	177	4154247	3.96383	5.18301	10.1259	19.2727	c	Putative sRNA
4176261	15	288	4175917	3.54715	4.42087	6.49077	14.4588	c	Putative sRNA
4195463	15	232	4195175	4.98548	5.37638	8.28319	18.6451	c	T-Box
4204200	13	106	4204040	3.69557	6.03031	5.26529	14.9912	c	Putative sRNA
4210987	17	264	4210665	4.98548	5.18301	6.82038	16.9889	c	T-Box
4228504	17	56	4228390	3.96383	4.59522	6.11627	14.6753	c	Putative sRNA
4230841	12	322	4230466	3.96383	6.03031	5.62726	15.6214	c	Putative sRNA
4231127	16	266	4230804	3.32784	3.57357	7.19627	14.0977	c	Putative sRNA
4247290	14	113	4247122	3.96383	5.00866	6.41551	15.388	c	Putative sRNA
4252087	12	65	4251969	2.20597	5.18301	5.16288	12.5519	c	L21_leader
4266477	17	254	4266165	3.76171	4.16136	5.80326	13.7263	c	T-Box
4284203	16	157	4283989	3.37605	6.03031	5.07313	14.4795	c	Putative sRNA
4307879	12	151	4307675	3.96383	4.59522	6.28801	14.8471	c	Putative sRNA
4356365	14	67	4356243	3.16148	4.42087	6.91155	14.4939	c	Putative sRNA
4356583	17	282	4356243	3.32784	6.03031	6.91155	16.2697	c	T-Box
4366131	18	208	4365864	2.20597	6.03031	6.75538	14.9917	c	T-Box
4370054	17	168	4369828	2.20597	2.41939	9.72894	14.3543	c	T-Box
4371230	13	227	4370949	2.13983	4.02883	8.38756	14.5562	c	Putative sRNA
4377150	13	58	4377038	2.15777	6.03031	6.84646	15.0345	c	Putative sRNA
4381376	12	124	4381199	4.98548	4.42087	4.7572	14.1636	c	L20_leader
4383739	18	191	4383489	2.42528	2.52761	8.15726	13.1102	c	T-Box
4462481	18	238	4462184	4.98548	2.31673	6.44835	13.7506	c	T-Box
4496852	17	72	4496722	4.18314	4.42087	6.6708	15.2748	c	Putative sRNA
4509681	15	40	4509585	2.94218	4.59522	6.54588	14.0833	c	Putative sRNA
4531233	18	301	4530873	3.76171	4.42087	4.74284	12.9254	c	T-Box
4550381	14	62	4550264	3.32784	4.42087	6.45442	14.2031	c	Putative sRNA
4560002	16	45	4559900	3.96383	6.03031	5.86827	15.8624	c	Putative sRNA
4576190	16	100	4576033	3.96383	5.18301	5.59763	14.7445	c	Putative sRNA
4580354	12	121	4580180	3.16148	4.42087	6.53106	14.1134	c	Putative sRNA
4586810	17	74	4586678	3.10778	4.59522	7.19836	14.9014	c	Putative sRNA
4590451	16	86	4590308	2.52558	4.02883	7.96147	14.5159	c	Putative sRNA
4614622	16	92	4614473	2.35439	3.57357	8.15003	14.078	c	Putative sRNA
4614857	14	329	4614473	3.96383	2.41939	8.15003	14.5333	c	Putative sRNA
4615330	15	71	4615203	2.52558	5.37638	6.20137	14.1033	c	Putative sRNA
4637136	17	100	4636978	3.76171	5.18301	5.97874	14.9235	c	Putative sRNA
4637346	18	309	4636978	2.20597	6.03031	5.97874	14.215	c	Putative sRNA
4685518	13	221	4685243	3.81541	4.42087	8.70078	16.9371	c	Putative sRNA
4687190	14	306	4686829	3.32784	5.37638	6.02546	14.7297	c	Putative sRNA
4740067	17	212	4739797	4.98548	5.00866	5.38986	15.384	c	SAM/S_box
4768942	16	44	4768841	3.37605	2.91965	8.40164	14.6973	c	Putative sRNA
4769157	16	259	4768841	3.32784	6.03031	8.40164	17.7598	c	T-Box
4784319	17	286	4783975	3.32784	5.00866	7.42962	15.7661	c	T-Box
4819021	17	232	4818731	4.98548	6.03031	6.18484	17.2006	c	Putative sRNA
4827793	18	185	4827549	2.52559	5.37638	6.9511	14.8531	c	Putative sRNA
4834847	16	56	4834734	2.57373	6.03031	5.77204	14.3761	c	tmRNA
4840515	13	240	4840221	3.96383	5.00866	6.80211	15.7746	c	Putative sRNA
4867502	17	129	4867315	3.32784	5.37638	6.77103	15.4753	c	Putative sRNA
4872432	18	93	4872280	2.20597	6.03031	9.40556	17.6418	c	Putative sRNA
4912282	18	315	4911908	4.34949	5.18301	7.94976	17.4823	c	Putative sRNA
4953554	17	171	4953325	3.16148	4.42087	6.71443	14.2968	c	TPP/THI
4961126	15	80	4960990	4.71722	2.41939	7.5828	14.7194	c	Putative sRNA
4961373	12	330	4960990	2.52554	4.02883	7.5828	14.1372	c	Putative sRNA
4961499	13	239	4961206	3.96383	5.37638	5.71969	15.0599	c	Putative sRNA
4966772	17	314	4966400	4.18314	4.59522	7.51597	16.2943	c	Putative sRNA
4980276	18	169	4980048	2.94218	6.03031	6.5479	15.5204	c	Putative sRNA
4996158	18	114	4995985	3.69557	4.52908	5.88586	14.1105	c	Putative sRNA
5014610	13	156	5014400	2.00385	4.59522	8.01644	14.6155	c	Putative sRNA
5067488	17	95	5067335	4.34949	4.42087	6.17065	14.941	c	Putative sRNA
5089936	18	322	5089555	3.91487	5.18301	7.28114	16.379	c	Putative sRNA
5090199	14	242	5089902	3.69557	5.18301	6.95191	15.8305	c	Putative sRNA
5090712	18	110	5090543	3.10778	5.00866	7.39988	15.5163	c	Putative sRNA
5091705	17	289	5091358	2.74006	5.18301	7.40775	15.3308	c	Putative sRNA
5093391	16	61	5093273	2.94218	6.03031	5.17508	14.1476	c	Putative sRNA
5119111	18	182	5118870	4.98548	4.42087	6.11972	15.5261	c	Putative sRNA
5123365	16	97	5123211	3.96383	5.18301	5.42169	14.5685	c	Putative sRNA
5140368	17	165	5140145	4.98548	4.42087	5.45334	14.8597	c	SAM
5161757	17	111	5161588	3.32784	6.03031	6.19104	15.5492	c	Putative sRNA
5188587	14	111	5188421	3.37605	4.52908	7.61789	15.523	c	Putative sRNA
5227210	18	185	5226966	4.98548	6.03031	7.63004	18.6458	c	Putative sRNA
-----------------------------------------------------------------
Start1 - Start of the Promoter [-35] box
D1 - Spacer between [-35] & [-10] boxes
D2-Predicted length of sRNA transcript-encoding region
End3 - End of Terminator
Sum of scores value for PWM1 [-35 box]
Sum of scores value for PWM2 [-10 box]
Sum of scores value for PWM3 [rho-independent terminator]
CSS - Cumulative sum of scores
c-Complementary strand
-----------------------------------------------------------------

## Sheet: Sheet3
Sheet 3: Clostridium tetani (AE015927.fna) 21 known and 152 'novel' sRNAs positive strand
Start1	D1	D2	End3	Score1	Score2	Score3	CSS	Comment
10236	12	189	10479	2.37707	6.03031	5.82442	14.2318	Putative sRNA
24321	14	90	24467	2.30619	5.18301	7.53817	15.0274	Putative sRNA
43345	14	338	43739	3.96383	4.35473	6.40675	14.7253	Putative sRNA
52970	17	219	53248	4.98548	6.03031	4.97048	15.9863	Putative sRNA
78452	17	264	78775	3.37605	6.03031	5.1475	14.5539	Putative sRNA
172251	17	159	172469	3.96383	6.03031	7.9528	17.9469	T-Box
198476	17	223	198758	3.96383	5.37638	6.7506	16.0908	Putative sRNA
211059	12	271	211384	4.98548	6.03031	6.07307	17.0889	Putative sRNA
227909	17	72	228040	4.98548	6.03031	3.79082	14.8066	Putative sRNA
231165	12	252	231471	4.98548	6.03031	5.46789	16.4837	T-Box
261559	17	268	261886	4.34949	6.03031	7.86616	18.246	Putative sRNA
261734	13	97	261886	2.20597	3.94139	7.86616	14.0135	Putative sRNA
303282	17	159	303500	4.98548	3.76694	5.80623	14.5587	SAM/S_box
308897	14	118	309071	2.35439	6.03031	7.32613	15.7108	Putative sRNA
318363	17	160	318582	3.10778	6.03031	5.59724	14.7353	FMN
326152	14	112	326320	2.35439	5.18301	3.77887	11.3163	T-Box
337650	16	98	337806	4.98548	6.03031	5.99771	17.0135	Putative sRNA
378550	12	215	378819	4.34949	5.37638	4.51533	14.2412	Putative sRNA
379512	14	337	379905	2.52559	6.03031	3.57998	12.1359	tmRNA
399468	14	172	399696	2.37707	6.03031	6.56597	14.9733	Putative sRNA
439962	15	329	440348	2.15227	5.37638	7.23171	14.7604	Putative sRNA
440235	17	54	440348	2.74006	6.03031	7.23171	16.0021	Putative sRNA
535337	16	300	535695	2.74006	6.03031	6.44919	15.2196	Putative sRNA
535463	16	174	535695	2.20597	6.03031	6.44919	14.6855	Putative sRNA
539229	14	67	539352	2.94218	6.03031	5.80295	14.7754	Putative sRNA
549252	15	215	549524	2.30619	6.03031	5.69358	14.0301	Putative sRNA
572422	18	125	572607	2.94218	4.59522	6.62254	14.1599	Putative sRNA
621429	12	41	621524	3.96383	3.94136	6.78654	14.6917	Putative sRNA
625139	17	277	625475	2.35439	5.37638	6.4328	14.1636	Putative sRNA
625262	12	159	625475	2.74006	6.03031	6.4328	15.2032	Putative sRNA
625909	15	72	626038	3.96383	6.03031	5.78311	15.7773	Putative sRNA
648815	17	61	648935	2.94218	5.37638	6.05559	14.3742	Putative sRNA
649115	17	136	649310	3.69557	6.03031	5.11523	14.8411	Putative sRNA
661720	16	113	661891	2.30619	6.03031	6.23785	14.5744	Putative sRNA
662377	14	110	662543	2.94218	6.03031	7.0868	16.0593	Putative sRNA
662460	14	106	662622	3.16148	6.03031	5.56093	14.7527	Putative sRNA
676802	18	195	677057	4.98548	4.42087	6.72301	16.1294	Putative sRNA
680262	17	110	680431	2.57379	6.03031	4.52332	13.1274	yybP_ykoY
684026	18	42	684128	3.69557	5.37638	7.54469	16.6166	Putative sRNA
688225	17	187	688471	4.98548	3.57357	3.32072	11.8798	FMN
708770	16	46	708874	3.37605	5.37638	5.97834	14.7308	Putative sRNA
713234	17	124	713417	4.34949	6.03031	5.48367	15.8635	Putative sRNA
741981	12	296	742331	2.35439	5.37638	7.19008	14.9208	Putative sRNA
745303	12	237	745594	4.98548	4.59522	6.69869	16.2794	Cobalamin
768720	12	94	768868	2.74006	2.31673	6.9083	11.9651	Cobalamin
769940	17	256	770255	2.74006	6.03031	6.69869	15.4691	Cobalamin
792858	16	57	792973	3.16148	5.37638	8.32272	16.8606	Putative sRNA
793469	17	86	793614	3.37605	6.03031	5.14092	14.5473	Cobalamin
823495	16	142	823695	2.30619	4.52908	7.18419	14.0195	Cobalamin
827092	17	274	827425	4.98548	6.03031	6.93298	17.9488	Putative sRNA
833201	12	231	833486	3.37605	6.03031	8.85176	18.2581	T-Box
853790	14	172	854018	4.98548	6.03031	5.27827	16.2941	Putative sRNA
881987	12	209	882250	3.96383	4.42087	8.14771	16.5324	T-Box
912347	15	279	912683	3.32784	5.37638	7.21344	15.9177	Putative sRNA
912557	17	67	912683	3.81541	6.03031	7.21344	17.0592	Putative sRNA
938130	16	47	938235	2.94218	4.42087	6.81744	14.1805	Putative sRNA
954048	17	137	954244	4.98548	5.37638	3.85312	14.215	Putative sRNA
957211	16	114	957383	4.98548	6.03031	3.38095	14.3967	Putative sRNA
972147	16	142	972347	3.32784	6.03031	6.67922	16.0374	Putative sRNA
1024541	17	253	1024853	3.96383	3.76694	6.13767	13.8684	Cobalamin
1031168	16	197	1031423	2.35439	4.42087	4.83458	11.6098	T-Box
1085644	18	239	1085943	2.35439	6.03031	6.04189	14.4266	Putative sRNA
1085950	13	135	1086140	3.96383	6.03031	5.03517	15.0293	Putative sRNA
1123524	17	195	1123778	4.98548	6.03031	4.92996	15.9458	T-Box
1126602	17	147	1126808	2.00385	6.03031	6.1273	14.1615	Putative sRNA
1179527	16	313	1179898	3.17942	4.16136	6.72016	14.0609	Putative sRNA
1179647	16	193	1179898	3.81541	5.00866	6.72016	15.5442	Putative sRNA
1183572	18	101	1183733	3.96383	6.03031	4.52747	14.5216	Putative sRNA
1207712	13	85	1207852	3.16148	6.03031	8.2408	17.4326	Putative sRNA
1207754	14	42	1207852	3.96383	5.00866	8.2408	17.2133	Putative sRNA
1238427	17	117	1238603	3.17942	4.42087	7.07072	14.671	Putative sRNA
1240387	15	50	1240494	2.30619	5.18301	6.51666	14.0059	Putative sRNA
1270218	13	100	1270373	2.79376	5.18301	7.06362	15.0404	Putative sRNA
1285407	15	168	1285632	2.94218	4.42087	6.68865	14.0517	Putative sRNA
1386368	18	342	1386770	2.35439	4.42087	7.4401	14.2154	Putative sRNA
1390722	17	306	1391087	2.35439	6.03031	6.01407	14.3988	Putative sRNA
1405419	12	59	1405532	2.30619	5.37638	6.80096	14.4835	Putative sRNA
1406201	17	47	1406307	2.15701	5.00866	7.58214	14.7478	Putative sRNA
1456676	18	46	1456782	3.96383	6.03031	6.77421	16.7684	Putative sRNA
1461958	15	271	1462286	2.94218	4.59522	6.68133	14.2187	Putative sRNA
1487900	16	250	1488208	3.96383	3.50743	9.18885	16.6601	Putative sRNA
1488028	14	124	1488208	3.96383	4.59522	9.18885	17.7479	Putative sRNA
1494081	16	226	1494365	3.96383	4.59522	6.72418	15.2832	Putative sRNA
1494259	18	46	1494365	3.96383	6.03031	6.72418	16.7183	Putative sRNA
1494551	14	313	1494920	2.20597	4.42087	8.01916	14.646	Putative sRNA
1494815	18	45	1494920	2.74006	4.59522	8.01916	15.3544	Putative sRNA
1494949	12	68	1495071	2.30619	5.37638	6.908	14.5906	Putative sRNA
1495818	17	330	1496207	3.32784	6.03031	5.12881	14.487	Putative sRNA
1511738	13	245	1512038	2.52557	5.37638	7.80708	15.709	Cobalamin
1511869	17	110	1512038	3.16148	4.35473	7.80708	15.3233	Putative sRNA
1526449	13	100	1526604	3.16148	5.37638	7.3382	15.8761	Putative sRNA
1526677	12	188	1526919	3.16148	6.03031	5.36461	14.5564	Putative sRNA
1536071	17	144	1536274	3.96383	6.03031	5.01457	15.0087	Putative sRNA
1540845	12	211	1541110	2.89322	6.03031	5.21865	14.1422	Putative sRNA
1541935	16	71	1542064	3.96383	6.03031	5.70445	15.6986	Putative sRNA
1542415	14	331	1542802	3.16148	6.03031	5.18207	14.3739	Putative sRNA
1544211	15	329	1544597	2.79376	4.42087	9.20698	16.4216	Putative sRNA
1544473	18	64	1544597	2.35439	3.37499	9.20698	14.9364	Putative sRNA
1544735	15	178	1544970	2.30619	6.03031	5.70196	14.0385	Putative sRNA
1544986	17	162	1545207	4.98548	6.03031	4.03485	15.0506	Putative sRNA
1555280	12	294	1555628	3.96383	5.37638	5.72052	15.0607	Putative sRNA
1568068	15	277	1568402	3.16148	3.57357	7.59789	14.3329	Putative sRNA
1568301	16	43	1568402	2.20597	6.03031	7.59789	15.8342	Putative sRNA
1570617	18	164	1570841	2.94218	5.37638	6.13965	14.4582	Putative sRNA
1589204	17	161	1589424	3.16148	6.03031	4.88525	14.077	Putative sRNA
1593041	13	270	1593366	2.94218	5.00866	6.29964	14.2505	Putative sRNA
1606760	18	301	1607121	3.69557	6.03031	5.99023	15.7161	Putative sRNA
1616617	17	173	1616849	3.69557	5.37638	5.8869	14.9588	Putative sRNA
1628003	16	152	1628213	2.67391	5.18301	6.83244	14.6894	Putative sRNA
1641612	12	302	1641968	2.35439	6.03031	6.36303	14.7477	Putative sRNA
1663115	16	254	1663427	2.30619	6.03031	6.05114	14.3876	Putative sRNA
1675326	14	214	1675596	3.69557	6.03031	4.66914	14.395	Putative sRNA
1683767	14	69	1683892	2.79376	5.18301	6.08806	14.0648	Putative sRNA
1692723	17	174	1692956	4.34949	5.18301	5.0505	14.583	Putative sRNA
1693579	12	258	1693891	3.96383	6.03031	4.45654	14.4507	Putative sRNA
1694654	17	58	1694771	3.96383	6.03031	4.91725	14.9114	Putative sRNA
1706710	13	90	1706855	3.69557	5.37638	5.28526	14.3572	Putative sRNA
1777128	13	231	1777414	3.16148	6.03031	5.63764	14.8294	Putative sRNA
1791710	13	72	1791837	3.10778	4.02883	7.19768	14.3343	Putative sRNA
1803653	14	83	1803792	2.13983	5.37638	6.75564	14.2719	Putative sRNA
1807765	13	103	1807923	2.52559	6.03031	6.16025	14.7162	Putative sRNA
1833521	14	79	1833656	3.96383	5.18301	5.23835	14.3852	Putative sRNA
1848574	17	92	1848725	3.91487	5.18301	6.3855	15.4834	Putative sRNA
1863527	15	115	1863699	3.69557	5.37638	5.51628	14.5882	Putative sRNA
1868765	14	280	1869101	2.35439	6.03031	5.99243	14.3771	Putative sRNA
1871151	16	48	1871257	4.98548	2.31673	7.60114	14.9033	Putative sRNA
1925343	12	227	1925624	4.98548	4.52908	10.7736	20.2882	Glycine
1985650	16	294	1986002	3.37605	3.94135	7.31648	14.6339	Putative sRNA
2007083	15	104	2007244	3.69557	6.03031	4.64391	14.3698	Putative sRNA
2013055	17	289	2013403	4.98548	5.37638	5.33262	15.6945	Putative sRNA
2016967	13	143	2017165	2.94218	5.18301	5.88734	14.0125	Putative sRNA
2020722	13	80	2020857	2.52559	5.18301	7.9714	15.68	Putative sRNA
2030353	18	271	2030684	2.94218	5.18301	5.88124	14.0064	Putative sRNA
2030874	12	217	2031145	2.94218	3.57357	8.58006	15.0958	Putative sRNA
2031044	17	42	2031145	2.74006	4.42087	8.58006	15.741	Putative sRNA
2048873	16	288	2049219	4.71722	4.02883	7.21669	15.9627	Putative sRNA
2049068	15	94	2049219	3.32784	5.18301	7.21669	15.7275	Putative sRNA
2049536	16	172	2049766	4.98548	4.52908	6.4153	15.9299	Putative sRNA
2053565	12	240	2053859	2.94218	6.03031	5.30733	14.2798	Putative sRNA
2123889	15	264	2124210	3.69557	5.00866	7.30358	16.0078	Putative sRNA
2124105	18	45	2124210	2.20597	6.03031	7.30358	15.5399	Putative sRNA
2127535	16	106	2127699	2.89322	5.37638	6.43928	14.7089	Putative sRNA
2164491	12	48	2164593	4.18314	5.37638	5.07052	14.63	Putative sRNA
2198492	12	327	2198873	4.18314	4.02883	6.84635	15.0583	Putative sRNA
2243020	17	151	2243230	4.34949	5.37638	5.52	15.2459	Putative sRNA
2243611	18	145	2243816	3.96383	6.03031	5.06853	15.0627	Putative sRNA
2246636	16	274	2246968	3.96383	3.57357	6.52901	14.0664	Putative sRNA
2246834	15	77	2246968	3.96383	3.94135	6.52901	14.4342	Putative sRNA
2252957	12	116	2253127	3.32784	5.18301	5.98589	14.4967	Putative sRNA
2267772	18	204	2268036	4.98548	6.03031	4.97668	15.9925	Putative sRNA
2278743	16	188	2278989	2.52558	5.37638	7.47373	15.3757	Putative sRNA
2278943	14	136	2279135	2.52559	5.37638	6.76689	14.6689	Putative sRNA
2294499	14	179	2294734	3.16148	6.03031	5.49185	14.6836	Putative sRNA
2409651	12	58	2409763	3.69557	3.57357	7.61743	14.8866	Putative sRNA
2412616	15	112	2412785	3.96383	5.37638	5.02618	14.3664	Putative sRNA
2448320	14	172	2448548	3.16148	6.03031	5.59596	14.7878	Putative sRNA
2527497	12	88	2527639	3.32784	5.37638	6.80071	15.5049	Putative sRNA
2530726	16	282	2531066	3.32784	5.37638	6.92838	15.6326	Putative sRNA
2538583	15	277	2538917	3.37605	3.37499	8.25286	15.0039	Putative sRNA
2538818	14	43	2538917	2.74006	4.59522	8.25286	15.5881	Putative sRNA
2554077	16	144	2554279	3.69557	4.42087	7.27931	15.3957	Putative sRNA
2554459	12	87	2554600	2.20597	6.03031	6.14559	14.3819	Putative sRNA
2557728	13	122	2557905	3.96383	4.42087	5.78509	14.1698	Putative sRNA
2577666	17	203	2577928	4.71722	6.03031	4.81817	15.5657	Putative sRNA
2622171	15	187	2622415	4.34949	5.18301	6.08021	15.6127	Putative sRNA
2633390	17	164	2633613	3.17942	5.37638	6.72251	15.2783	Putative sRNA
2666940	16	86	2667084	3.16148	5.18301	5.893	14.2375	Putative sRNA
2710986	15	42	2711085	2.74006	3.57357	3.5639	9.87753	ydaO_yuaA
2735638	16	319	2736015	2.89322	6.03031	5.99498	14.9185	Putative sRNA
2735839	13	121	2736015	2.94218	5.37638	5.99498	14.3135	Putative sRNA
2746056	13	167	2746278	2.30619	6.03031	7.01786	15.3544	Putative sRNA
2763927	14	107	2764090	2.89322	5.37638	6.20392	14.4735	Putative sRNA
2798820	12	179	2799053	2.37707	6.03031	5.7426	14.15	Putative sRNA
-----------------------------------------------------------------
Start1 - Start of the Promoter [-35] box
D1 - Spacer between [-35] & [-10] boxes
D2-Predicted length of sRNA transcript-encoding region
End3 - End of Terminator
Sum of scores value for PWM1 [-35 box]
Sum of scores value for PWM2 [-10 box]
Sum of scores value for PWM3 [rho-independent terminator]
CSS - Cumulative sum of scores
-----------------------------------------------------------------

## Sheet: Sheet4
Sheet 4: Clostridium tetani (AE015927.fna) 24 known and 133 'novel' sRNAs negative strand
Start1	D1	D2	End3	Score1	Score2	Score3	CSS	Strand	Comment
24366	17	340	23968	3.37605	6.03031	3.0267	12.4331	c	SRP_bact
28600	17	93	28449	4.98548	6.03031	5.62596	16.6417	c	Putative sRNA
30261	17	217	29986	4.98548	6.03031	7.14346	18.1593	c	Putative sRNA
53045	17	259	52728	2.52557	6.03031	5.56846	14.1243	c	Putative sRNA
65327	12	64	65210	3.32784	6.03031	5.04004	14.3982	c	Putative sRNA
78815	13	190	78571	2.79376	4.42087	7.60861	14.8232	c	Putative sRNA
82350	12	73	82224	4.71722	3.37495	5.9533	14.0455	c	Putative sRNA
102708	17	277	102373	4.98548	6.03031	6.70066	17.7164	c	T-Box
125207	18	283	124865	3.96383	5.37638	6.79242	16.1326	c	Putative sRNA
157780	15	212	157512	3.37605	4.42087	6.37493	14.1718	c	Putative sRNA
158628	15	58	158514	3.37605	4.02883	6.67177	14.0767	c	Putative sRNA
158851	16	73	158721	2.52559	6.03031	7.08063	15.6365	c	Putative sRNA
183079	14	49	182975	3.16148	5.37638	5.49491	14.0328	c	Putative sRNA
195041	15	302	194683	3.17942	6.03031	5.24592	14.4557	c	Putative sRNA
197481	15	244	197181	3.54715	6.03031	5.60754	15.185	c	Putative sRNA
214473	13	109	214310	2.74006	4.42087	6.93479	14.0957	c	Putative sRNA
222815	15	45	222714	3.69557	4.02883	7.359	15.0834	c	TPP
229216	17	132	229026	2.67391	4.42087	7.46681	14.5616	c	Putative sRNA
262035	17	72	261905	4.98548	5.37638	7.60673	17.9686	c	Putative sRNA
283638	18	303	283276	4.34949	6.03031	6.98469	17.3645	c	Putative sRNA
300168	18	272	299837	3.96383	6.03031	5.98486	15.979	c	Putative sRNA
321138	15	130	320952	2.30619	6.03031	6.07206	14.4086	c	Putative sRNA
327439	15	61	327322	2.89322	4.59522	6.95568	14.4441	c	Putative sRNA
327593	14	216	327322	2.74006	4.42087	6.95568	14.1166	c	Putative sRNA
424407	13	69	424284	3.16148	6.03031	5.0426	14.2344	c	Putative sRNA
434137	15	63	434018	3.32784	5.37638	7.07171	15.7759	c	Putative sRNA
434268	14	195	434018	3.69557	6.03031	7.07171	16.7976	c	Putative sRNA
471123	14	56	471012	3.96383	6.03031	4.40086	14.395	c	Putative sRNA
471446	17	161	471227	2.59164	6.03031	5.7757	14.3977	c	Putative sRNA
486418	16	149	486212	3.96383	5.37638	6.3689	15.7091	c	Putative sRNA
505548	16	182	505309	3.96383	4.02883	6.52188	14.5145	c	Putative sRNA
509784	17	214	509512	4.34949	4.42087	7.44602	16.2164	c	Putative sRNA
509998	16	188	509753	2.52552	6.03031	5.67178	14.2276	c	Putative sRNA
539762	17	147	539557	3.96383	6.03031	5.52906	15.5232	c	Putative sRNA
545934	16	107	545770	3.69557	5.37638	5.52988	14.6018	c	Putative sRNA
546413	15	145	546212	3.16148	6.03031	5.23835	14.4301	c	Putative sRNA
546581	17	66	546457	2.35439	6.03031	6.51043	14.8951	c	Putative sRNA
549557	15	67	549434	2.30619	4.59522	7.10652	14.0079	c	Putative sRNA
583002	18	65	582878	2.35439	5.37638	6.38225	14.113	c	Putative sRNA
584868	17	114	584696	3.91487	2.59375	7.5631	14.0717	c	Putative sRNA
593319	15	91	593172	2.89322	3.94135	7.54502	14.3796	c	Putative sRNA
596646	12	62	596531	2.52556	4.59522	6.91569	14.0365	c	Putative sRNA
596660	14	74	596531	2.79376	6.03031	6.91569	15.7398	c	Putative sRNA
636362	18	340	635963	2.52551	4.42087	7.20664	14.153	c	Putative sRNA
636912	17	180	636674	3.16148	6.03031	5.46423	14.656	c	Putative sRNA
638491	13	173	638264	3.37605	5.37638	5.63681	14.3892	c	Putative sRNA
649165	13	269	648842	3.32784	6.03031	6.24649	15.6046	c	Putative sRNA
656315	12	168	656094	3.69557	4.59522	5.81952	14.1103	c	Putative sRNA
672152	13	87	672011	3.69557	6.03031	4.36862	14.0945	c	Putative sRNA
719659	12	225	719381	2.13983	6.03031	9.08519	17.2553	c	T-Box
730740	17	165	730517	3.96383	5.37638	6.76582	16.106	c	Putative sRNA
737010	14	61	736894	3.16148	5.37638	8.87725	17.4151	c	Putative sRNA
742312	17	233	742021	3.96383	6.03031	5.782	15.7761	c	Putative sRNA
793155	15	117	792982	2.30619	5.37638	6.85153	14.5341	c	Putative sRNA
793429	17	285	793086	4.34949	5.18301	7.35344	16.8859	c	Cobalamin
853766	14	103	853608	3.22762	4.52908	6.30905	14.0657	c	Putative sRNA
854074	17	320	853696	4.34949	5.37638	5.67073	15.3966	c	Putative sRNA
877196	17	112	877026	3.16148	5.00866	5.21249	13.3826	c	TPP
884740	16	195	884488	4.34949	3.94135	7.37638	15.6672	c	Putative sRNA
893857	15	90	893711	2.94218	5.18301	6.91188	15.0371	c	Putative sRNA
907183	16	142	906984	3.32784	5.37638	6.42942	15.1336	c	Putative sRNA
928944	18	153	928732	2.79376	6.03031	6.6752	15.4993	c	Putative sRNA
931211	13	111	931046	2.13983	5.18301	7.44454	14.7674	c	Putative sRNA
931273	18	168	931046	3.16148	5.18301	7.44454	15.789	c	Putative sRNA
933850	16	284	933509	3.32784	5.37638	5.44828	14.1525	c	Putative sRNA
990671	12	69	990549	3.16148	6.03031	5.32652	14.5183	c	Putative sRNA
1010519	17	53	1010408	3.96383	5.37638	4.82382	14.164	c	Putative sRNA
1031450	13	215	1031181	2.94218	5.37638	6.27312	14.5917	c	Putative sRNA
1085877	12	97	1085727	4.98548	4.02883	6.56644	15.5808	c	Putative sRNA
1086079	17	294	1085727	4.71722	3.94135	6.56644	15.225	c	Putative sRNA
1141445	15	168	1141221	2.89322	5.18301	7.03182	15.1081	c	Putative sRNA
1143172	15	178	1142938	2.94218	3.94133	7.32647	14.21	c	Putative sRNA
1151627	17	262	1151307	2.52557	5.18301	6.67623	14.3848	c	Putative sRNA
1160029	14	154	1159820	3.96383	4.52908	7.70293	16.1958	c	Putative sRNA
1162509	14	110	1162344	2.94218	5.37638	6.64437	14.9629	c	Putative sRNA
1174591	13	182	1174355	2.15777	6.03031	6.0571	14.2452	c	Putative sRNA
1179289	13	216	1179019	2.74006	5.37638	7.41105	15.5275	c	Putative sRNA
1179376	12	304	1179019	2.79376	6.03031	7.41105	16.2351	c	Putative sRNA
1179818	12	203	1179562	3.69557	3.94135	7.41189	15.0488	c	Putative sRNA
1194285	18	146	1194080	3.96383	5.37638	6.59225	15.9325	c	Putative sRNA
1208595	12	65	1208477	2.52558	6.03031	6.25085	14.8067	c	Putative sRNA
1208728	12	198	1208477	2.94218	5.37638	6.25085	14.5694	c	Putative sRNA
1217196	15	49	1217091	2.94218	6.03031	5.19054	14.163	c	Putative sRNA
1223615	12	195	1223367	3.91487	3.57357	7.57593	15.0644	c	Putative sRNA
1231662	15	78	1231528	4.98548	4.52908	6.57065	16.0852	c	Putative sRNA
1231920	17	178	1231684	3.69557	3.37499	8.03005	15.1006	c	Putative sRNA
1243711	13	43	1243614	3.32784	6.03031	4.75449	14.1126	c	Putative sRNA
1249062	14	49	1248958	2.94218	5.37638	5.94747	14.266	c	Putative sRNA
1252488	13	47	1252387	3.37605	2.98579	7.99491	14.3567	c	Putative sRNA
1267553	13	146	1267353	2.35439	5.37638	7.12592	14.8567	c	Putative sRNA
1340373	14	111	1340207	2.89322	6.03031	5.59001	14.5135	c	Putative sRNA
1340443	15	180	1340207	3.10778	5.37638	5.59001	14.0742	c	Putative sRNA
1372878	15	179	1372643	2.52553	6.03031	7.63407	16.1899	c	Putative sRNA
1391172	12	76	1391043	2.67391	6.03031	6.54434	15.2486	c	Putative sRNA
1393075	12	99	1392923	2.15777	5.37638	6.50857	14.0427	c	Putative sRNA
1429860	16	164	1429639	4.98548	6.03031	6.17709	17.1929	c	Putative sRNA
1456827	17	162	1456607	4.98548	6.03031	7.38364	18.3994	c	SAM/S_box
1481259	12	288	1480918	4.98548	4.42087	8.11091	17.5173	c	Cobalamin
1487902	13	48	1487800	2.94218	4.35473	8.24187	15.5388	c	Putative sRNA
1488071	17	213	1487800	4.98548	6.03031	8.24187	19.2577	c	Cobalamin
1543327	14	158	1543114	3.96383	3.57357	7.53781	15.0752	c	Putative sRNA
1544549	15	76	1544417	2.94218	2.59375	8.51005	14.046	c	Putative sRNA
1552602	16	152	1552393	2.94218	6.03031	6.80128	15.7738	c	Putative sRNA
1573123	14	99	1572969	2.30619	6.03031	5.85294	14.1894	c	Putative sRNA
1578201	14	158	1577988	3.32784	5.18301	6.02358	14.5344	c	Putative sRNA
1606808	13	170	1606584	3.96383	5.37638	6.21057	15.5508	c	Putative sRNA
1692917	18	75	1692783	3.96383	6.03031	5.1334	15.1275	c	Putative sRNA
1693548	17	42	1693448	4.98548	6.03031	3.50019	14.516	c	Putative sRNA
1694694	13	74	1694566	2.20597	5.00866	7.37954	14.5942	c	Putative sRNA
1741297	16	143	1741097	2.52558	6.03031	6.06018	14.6161	c	Putative sRNA
1866940	14	175	1866710	4.34949	3.76694	7.2524	15.3688	c	TPP/THI
1871299	12	79	1871167	3.96383	6.03031	7.87514	17.8693	c	Putative sRNA
1874283	12	118	1874112	3.96383	6.03031	4.65178	14.6459	c	Putative sRNA
1930308	15	149	1930103	4.34949	4.42087	5.91673	14.6871	c	Putative sRNA
1959334	14	132	1959147	3.16148	5.18301	6.24422	14.5887	c	Putative sRNA
1986024	17	280	1985686	4.98548	5.37638	7.91341	18.2753	c	T-Box
2001548	14	68	2001425	2.67391	6.03031	7.75405	16.4583	c	Putative sRNA
2013103	14	250	2012798	2.79376	6.03031	7.55734	16.3814	c	Putative sRNA
2030713	16	141	2030515	2.15777	5.37638	7.70293	15.2371	c	Putative sRNA
2030899	13	330	2030515	2.74006	4.59522	7.70293	15.0382	c	Putative sRNA
2031040	16	303	2030680	4.34949	6.03031	3.85825	14.238	c	Putative sRNA
2063910	12	147	2063710	3.69557	4.02883	9.30797	17.0324	c	Putative sRNA
2093922	14	47	2093820	2.52558	5.37638	6.20239	14.1044	c	Putative sRNA
2100846	14	233	2100558	3.96383	4.42087	4.74892	13.1336	c	Glycine
2118804	14	79	2118670	2.52559	6.03031	6.22748	14.7834	c	Putative sRNA
2123922	15	254	2123612	3.96383	4.42087	5.6812	14.0659	c	Putative sRNA
2128243	18	190	2127994	2.94218	5.00866	6.97088	14.9217	c	Putative sRNA
2135026	12	349	2134624	2.05755	2.33186	6.9581	11.3475	c	RNaseP_bact_a
2155780	18	144	2155577	4.98548	6.03031	4.2974	15.3132	c	Putative sRNA
2182562	17	84	2182420	4.98548	6.03031	6.88327	17.8991	c	Putative sRNA
2236313	17	227	2236028	3.37605	6.03031	7.76436	17.1707	c	6S
2243929	12	184	2243692	3.32784	5.00866	5.93839	14.2749	c	Putative sRNA
2307871	17	81	2307732	4.98548	6.03031	6.29649	17.3123	c	Putative sRNA
2309211	18	51	2309101	4.98548	4.42087	8.3825	17.7889	c	Putative sRNA
2345104	12	243	2344808	3.37605	6.03031	4.94621	14.3526	c	Putative sRNA
2406299	17	237	2406004	4.98548	4.42087	8.06863	17.475	c	T-Box
2410576	17	83	2410435	4.98548	6.03031	8.97679	19.9926	c	L20_leader
2412846	17	227	2412561	4.98548	6.03031	8.3093	19.3251	c	T-Box
2415098	17	301	2414739	4.98548	6.03031	5.31676	16.3326	c	Putative sRNA
2416626	13	302	2416270	2.15777	6.03031	3.16884	11.3569	c	Cobalamin
2429973	16	241	2429675	4.98548	6.03031	4.90684	15.9226	c	T-Box
2481965	12	138	2481774	3.32784	6.03031	5.3984	14.7566	c	Putative sRNA
2538969	13	46	2538869	2.52557	6.03031	7.4385	15.9944	c	Putative sRNA
2551508	17	212	2551238	4.98548	4.42087	4.20564	13.612	c	Purine
2577599	17	64	2577477	3.37605	5.00866	7.1275	15.5122	c	Putative sRNA
2586379	17	331	2585990	3.96383	6.03031	4.68996	14.6841	c	Putative sRNA
2605608	14	178	2605375	3.69557	6.03031	5.18179	14.9077	c	Lysine
2615271	15	78	2615137	3.37605	6.03031	6.9535	16.3599	c	Putative sRNA
2633738	15	230	2633452	3.22762	3.57357	7.94121	14.7424	c	Putative sRNA
2636123	17	90	2635975	2.79376	6.03031	5.83039	14.6545	c	Putative sRNA
2677012	15	156	2676800	2.74006	6.03031	4.91811	13.6885	c	SAM/S_box
2679874	14	95	2679724	2.94218	6.03031	7.88044	16.8529	c	Putative sRNA
2727342	16	64	2727221	4.98548	4.42087	4.70773	14.1141	c	Putative sRNA
2760691	12	116	2760522	4.98548	4.42087	6.24298	15.6493	c	Putative sRNA
2761875	12	118	2761704	4.98548	2.41939	4.22337	11.6282	c	L10_leader
2765767	12	164	2765550	4.98548	4.59522	4.43054	14.0112	c	Putative sRNA
2773581	15	132	2773393	2.20597	5.37638	4.33304	11.9154	c	T-Box
-----------------------------------------------------------------
Start1 - Start of the Promoter [-35] box
D1 - Spacer between [-35] & [-10] boxes
D2-Predicted length of sRNA transcript-encoding region
End3 - End of Terminator
Sum of scores value for PWM1 [-35 box]
Sum of scores value for PWM2 [-10 box]
Sum of scores value for PWM3 [rho-independent terminator]
CSS - Cumulative sum of scores
c-Complementary strand
-----------------------------------------------------------------

## Sheet: Sheet5
Sheet 5: Chlamydia trachomatis (AE001273.fna) 11 'novel' sRNAs in positive strand
Start1	D1	D2	End3	Score1	Score2	Score3	CSS	Comment
890	17	310	1259	2.95936	4.42087	9.17168	16.5519	Putative sRNA
1155	13	49	1259	2.20597	3.57357	9.17168	14.9512	Putative sRNA
48872	18	75	49007	4.18314	3.94139	7.18518	15.3097	Putative sRNA
79191	13	306	79552	2.67391	5.18301	7.24444	15.1014	Putative sRNA
79362	15	133	79552	3.32784	5.18301	7.24444	15.7553	Putative sRNA
158640	13	214	158909	4.18314	3.57357	6.55325	14.31	Putative sRNA
187836	14	154	188046	3.22762	4.42087	7.51876	15.1672	Putative sRNA
267738	17	67	267864	3.16148	4.59522	9.91475	17.6715	Putative sRNA
621205	12	142	621401	2.35439	4.02883	8.23316	14.6164	Putative sRNA
785060	14	73	785189	2.20597	3.39922	8.62498	14.2302	Putative sRNA
1007956	13	186	1008197	3.37605	6.03031	6.45297	15.8593	Putative sRNA
-----------------------------------------------------------------
Start1 - Start of the Promoter [-35] box
D1 - Spacer between [-35] & [-10] boxes
D2-Predicted length of sRNA transcript-encoding region
End3 - End of Terminator
Sum of scores value for PWM1 [-35 box]
Sum of scores value for PWM2 [-10 box]
Sum of scores value for PWM3 [rho-independent terminator]
CSS - Cumulative sum of scores
-----------------------------------------------------------------

## Sheet: Sheet6
Sheet 6: Chlamydia trachomatis (AE001273.fna) 3 known and 16 'novel' sRNAs in negative strand
Start1	D1	D2	End3	Score1	Score2	Score3	CSS	Strand	Comment
20801	15	348	20397	3.37605	2.91965	5.87628	12.172	c	tmRNA
93923	12	262	93608	3.69557	4.16136	6.88458	14.7415	c	Putative sRNA
252265	18	50	252156	2.35439	6.03031	6.07981	14.4645	c	Putative sRNA
286684	12	102	286529	3.37605	3.57357	6.61717	13.5668	c	SRP_bact
287264	12	85	287126	2.57378	4.52908	7.19238	14.2952	c	Putative sRNA
363877	16	44	363776	4.98548	6.03031	5.88455	16.9003	c	Putative sRNA
368355	18	60	368236	4.98548	3.37497	7.97096	16.3314	c	Putative sRNA
391105	14	74	390976	3.32784	6.03031	5.58955	14.9477	c	Putative sRNA
436544	17	240	436246	2.35439	6.03031	6.03332	14.418	c	Putative sRNA
457173	16	84	457032	3.16148	5.00866	6.2667	14.4368	c	RNaseP_bact_a
485438	15	219	485163	2.30543	4.42087	7.55011	14.2764	c	Putative sRNA
514379	15	92	514231	3.16148	5.37638	5.98023	14.5181	c	Putative sRNA
530870	15	45	530769	2.15777	5.37638	6.59058	14.1247	c	Putative sRNA
566317	15	47	566214	4.18314	3.94135	7.14825	15.2727	c	Putative sRNA
737250	16	117	737076	2.74489	4.42087	8.42417	15.5899	c	Putative sRNA
780572	15	145	780371	2.52558	2.52761	9.20381	14.257	c	Putative sRNA
854084	16	246	853781	2.35439	5.18301	8.06971	15.6071	c	Putative sRNA
876130	16	246	875827	2.35439	5.18301	8.06971	15.6071	c	Putative sRNA
974288	12	187	974048	2.20597	5.18301	7.38575	14.7747	c	Putative sRNA
-----------------------------------------------------------------
Start1 - Start of the Promoter [-35] box
D1 - Spacer between [-35] & [-10] boxes
D2-Predicted length of sRNA transcript-encoding region
End3 - End of Terminator
Sum of scores value for PWM1 [-35 box]
Sum of scores value for PWM2 [-10 box]
Sum of scores value for PWM3 [rho-independent terminator]
CSS - Cumulative sum of scores
c-Complementary strand
-----------------------------------------------------------------

## Sheet: Sheet7
Sheet 7: Helicobacter pylori (AE000511.fna) 1 known and 47 'novel' sRNAs in positive strand
Start1	D1	D2	End3	Score1	Score2	Score3	CSS	Comment
5053	18	288	5401	3.16148	4.52908	6.90181	14.5924	Putative sRNA
6415	16	189	6662	3.69557	3.57357	6.84149	14.1106	Putative sRNA
6729	17	224	7012	3.96383	4.42087	6.24348	14.6282	Putative sRNA
7357	13	88	7500	4.18314	4.42087	7.02758	15.6316	Putative sRNA
61915	15	179	62151	3.96383	4.52908	6.84107	15.334	Putative sRNA
80131	13	346	80532	2.13983	4.42087	8.32228	14.883	Putative sRNA
86282	14	294	86632	2.35439	3.37498	9.30669	15.0361	Putative sRNA
141351	16	77	141486	2.08613	4.59522	8.17548	14.8568	Putative sRNA
208343	14	270	208669	3.96383	6.03031	5.85287	15.847	Putative sRNA
214258	14	345	214659	2.74006	4.02883	9.27746	16.0464	Putative sRNA
214545	17	55	214659	3.16148	4.02883	9.27746	16.4678	Putative sRNA
348965	12	70	349089	3.01306	6.03031	5.79687	14.8402	Putative sRNA
425766	12	195	426015	3.96383	4.42087	6.33816	14.7229	Putative sRNA
425851	14	108	426015	3.32784	4.35473	6.33816	14.0207	Putative sRNA
448308	16	301	448667	2.15777	5.37638	6.94029	14.4744	Putative sRNA
537727	16	222	538007	3.32784	3.57357	7.1103	14.0117	Putative sRNA
586872	17	262	587193	3.32784	5.37638	5.76461	14.4688	Putative sRNA
629795	17	314	630168	2.74006	3.94132	5.89079	12.5722	RNaseP_bact_a
734052	13	155	734262	2.67391	3.76694	9.91645	16.3573	Putative sRNA
737153	13	173	737381	3.96383	6.03031	4.93382	14.928	Putative sRNA
780475	17	148	780682	3.16148	6.03031	6.43671	15.6285	Putative sRNA
843429	15	157	843643	4.34949	4.52908	6.33619	15.2148	Putative sRNA
927251	13	55	927361	2.35439	4.02883	8.32689	14.7101	Putative sRNA
932130	14	186	932372	2.67391	5.18301	6.6829	14.5398	Putative sRNA
954484	18	345	954889	3.69557	4.02883	6.83748	14.5619	Putative sRNA
964694	17	196	964949	2.30543	6.03031	7.40501	15.7408	Putative sRNA
1006264	15	286	1006607	3.16148	4.52908	6.46343	14.154	Putative sRNA
1044105	17	247	1044411	2.52551	5.37638	6.77996	14.6819	Putative sRNA
1046638	15	140	1046835	3.37605	5.00866	5.68899	14.0737	Putative sRNA
1068842	12	240	1069136	3.96383	4.42087	6.64154	15.0262	Putative sRNA
1069139	16	159	1069356	2.35439	5.00866	7.46119	14.8242	Putative sRNA
1069397	12	299	1069750	2.52553	3.18153	8.55381	14.2609	Putative sRNA
1069537	13	158	1069750	3.32784	2.52761	8.55381	14.4093	Putative sRNA
1105525	18	102	1105687	3.10778	4.42087	8.57163	16.1003	Putative sRNA
1413882	17	123	1414064	3.54715	4.52908	7.13166	15.2079	Putative sRNA
1430624	12	117	1430795	3.96383	3.94138	6.57834	14.4835	Putative sRNA
1441432	14	63	1441551	3.69557	6.03031	6.03555	15.7614	Putative sRNA
1449695	13	43	1449793	4.34949	3.94135	9.24913	17.54	Putative sRNA
1461184	12	72	1461310	3.16148	4.42087	6.69228	14.2746	Putative sRNA
1475900	18	322	1476282	3.16148	4.59522	6.2772	14.0339	Putative sRNA
1476939	12	64	1477057	2.52553	6.03031	5.99389	14.5497	Putative sRNA
1524627	14	65	1524748	2.79376	5.37638	6.47398	14.6441	Putative sRNA
1574305	12	52	1574411	4.98548	5.18301	3.8622	14.0307	Putative sRNA
1600818	15	206	1601081	3.37605	4.42087	6.47493	14.2719	Putative sRNA
1601116	14	178	1601350	3.96383	4.42087	5.79309	14.1778	Putative sRNA
1612681	16	152	1612891	4.34949	2.52761	7.78182	14.6589	Putative sRNA
1665619	17	157	1665835	3.96383	3.39922	6.82087	14.1839	Putative sRNA
1666835	15	109	1667001	2.94218	5.18301	8.01961	16.1448	Putative sRNA
-----------------------------------------------------------------
Start1 - Start of the Promoter [-35] box
D1 - Spacer between [-35] & [-10] boxes
D2-Predicted length of sRNA transcript-encoding region
End3 - End of Terminator
Sum of scores value for PWM1 [-35 box]
Sum of scores value for PWM2 [-10 box]
Sum of scores value for PWM3 [rho-independent terminator]
CSS - Cumulative sum of scores
-----------------------------------------------------------------

## Sheet: Sheet8
Sheet 8: Helicobacter pylori (AE000511.fna) 1 known and 60 'novel' sRNAs in negative strand
Start1	D1	D2	End3	Score1	Score2	Score3	CSS	Strand	Comment
9877	13	40	9783	3.32784	5.18301	6.56583	15.0767	c	Putative sRNA
44983	15	77	44850	2.08613	5.18301	9.01394	16.2831	c	Putative sRNA
61888	17	218	61612	3.37605	5.37638	5.54535	14.2978	c	Putative sRNA
62289	17	46	62185	4.18314	3.18153	8.45636	15.821	c	Putative sRNA
62544	13	305	62185	2.52553	3.94135	8.45636	14.9232	c	Putative sRNA
146733	18	81	146593	2.52559	6.03031	6.69452	15.2504	c	Putative sRNA
155749	17	221	155470	3.10778	3.37493	8.64156	15.1243	c	Putative sRNA
181676	16	92	181527	3.54715	4.52908	7.10884	15.1851	c	Putative sRNA
184618	13	92	184472	3.16148	6.03031	5.22803	14.4198	c	Putative sRNA
213803	13	147	213602	2.35439	5.00866	7.68197	15.045	c	Putative sRNA
244766	17	162	244546	2.30619	5.37638	7.11	14.7926	c	Putative sRNA
261597	17	86	261453	4.98548	6.03031	4.50165	15.5174	c	Putative sRNA
331710	12	56	331601	2.35439	3.57357	8.68611	14.6141	c	Putative sRNA
370081	13	324	369703	2.13983	6.03031	6.42041	14.5906	c	Putative sRNA
430884	12	58	430773	2.94218	2.98579	8.20898	14.137	c	Putative sRNA
445156	12	65	445038	2.52553	6.03031	5.99389	14.5497	c	Putative sRNA
446195	18	323	445813	3.16148	4.59522	6.2772	14.0339	c	Putative sRNA
494280	16	145	494078	2.20597	6.03031	5.86935	14.1056	c	Putative sRNA
518515	12	214	518248	2.35439	6.03031	6.99665	15.3813	c	Putative sRNA
539956	14	65	539836	3.16148	6.03031	5.44753	14.6393	c	Putative sRNA
586863	13	83	586726	4.34949	4.42087	6.95693	15.7273	c	Putative sRNA
665372	14	208	665109	2.08613	5.18301	7.05937	14.3285	c	Putative sRNA
699496	12	102	699341	2.35439	5.37638	6.47935	14.2101	c	Putative sRNA
774967	12	344	774570	2.52552	4.02883	8.54191	15.0963	c	Putative sRNA
820403	12	77	820273	2.52559	5.18301	7.78454	15.4931	c	Putative sRNA
838874	16	210	838607	3.96383	4.02883	4.20064	12.1933	c	tmRNA
865612	12	89	865470	3.32784	5.18301	5.55338	14.0642	c	Putative sRNA
879644	16	278	879309	4.18314	3.37499	7.9404	15.4985	c	Putative sRNA
888442	15	310	888076	2.35439	5.37638	6.51727	14.248	c	Putative sRNA
955534	17	313	955163	3.37605	4.02883	7.38018	14.7851	c	Putative sRNA
965063	13	152	964857	4.18314	3.94135	8.66388	16.7884	c	Putative sRNA
971027	12	157	970817	3.37605	4.02883	8.31271	15.7176	c	Putative sRNA
998104	18	254	997791	4.98548	4.42087	5.2352	14.6416	c	Putative sRNA
1005664	15	269	1005339	2.30619	4.52908	7.2288	14.0641	c	Putative sRNA
1043750	14	138	1043557	3.54715	4.35473	6.37838	14.2803	c	Putative sRNA
1062647	12	99	1062495	3.16148	3.94131	7.69032	14.7931	c	Putative sRNA
1063750	18	290	1063401	2.35439	3.57357	8.52269	14.4506	c	Putative sRNA
1067815	18	216	1067540	2.52559	3.94135	8.46561	14.9326	c	Putative sRNA
1071413	12	173	1071187	2.94218	5.37638	6.39462	14.7132	c	Putative sRNA
1072138	13	64	1072020	3.69557	4.42087	5.96354	14.08	c	Putative sRNA
1085200	13	75	1085071	3.16148	5.18301	6.09181	14.4363	c	Putative sRNA
1100864	12	303	1100508	3.54715	6.03031	7.17009	16.7476	c	Putative sRNA
1143410	15	59	1143295	3.32784	4.42087	6.83818	14.5869	c	Putative sRNA
1207412	17	153	1207201	2.94218	5.37638	7.47632	15.7949	c	Putative sRNA
1211201	13	164	1210983	2.67391	3.37499	8.05429	14.1032	c	Putative sRNA
1282409	18	296	1282054	4.98548	6.03031	4.78147	15.7973	c	Putative sRNA
1313522	16	233	1313232	4.98548	4.16136	7.26233	16.4092	c	Putative sRNA
1317827	15	217	1317554	3.10778	2.91965	8.68611	14.7135	c	Putative sRNA
1352086	18	332	1351695	3.96383	3.94133	7.13951	15.0447	c	Putative sRNA
1366928	16	75	1366796	2.74006	3.94139	7.76245	14.4439	c	Putative sRNA
1400875	13	40	1400781	3.96383	5.37638	6.94476	16.285	c	Putative sRNA
1470984	17	189	1470737	3.32784	6.03031	6.83315	16.1913	c	Putative sRNA
1473255	15	297	1472902	3.37605	4.42087	8.1338	15.9307	c	Putative sRNA
1473486	14	75	1473356	4.34949	3.18153	8.36085	15.8919	c	Putative sRNA
1473787	16	315	1473415	2.15777	5.37638	8.33405	15.8682	c	Putative sRNA
1488445	12	78	1488314	3.32784	3.18153	7.73078	14.2401	c	Putative sRNA
1496918	14	55	1496808	3.54715	4.42087	6.4398	14.4078	c	Putative sRNA
1497216	13	265	1496897	3.96383	4.59522	5.51565	14.0747	c	Putative sRNA
1510956	17	82	1510816	2.94218	5.37638	7.46101	15.7796	c	Putative sRNA
1533922	15	95	1533771	3.81541	2.59375	8.16475	14.5739	c	Putative sRNA
1647024	12	137	1646834	3.22762	4.02883	8.13561	15.3921	c	Putative sRNA
-----------------------------------------------------------------
Start1 - Start of the Promoter [-35] box
D1 - Spacer between [-35] & [-10] boxes
D2-Predicted length of sRNA transcript-encoding region
End3 - End of Terminator
Sum of scores value for PWM1 [-35 box]
Sum of scores value for PWM2 [-10 box]
Sum of scores value for PWM3 [rho-independent terminator]
CSS - Cumulative sum of scores
c-Complementary strand
-----------------------------------------------------------------

## Sheet: Sheet9
Sheet 9: Mycobacterium tuberculosis (AE000516.fna) 1 'novel' sRNA in positive strand
Start1	D1	D2	End3	Score1	Score2	Score3	CSS	Comment
1471122	18	116	1471298	4.34949	3.57357	7.79088	15.7139	Putative sRNA
-----------------------------------------------------------------
Start1 - Start of the Promoter [-35] box
D1 - Spacer between [-35] & [-10] boxes
D2-Predicted length of sRNA transcript-encoding region
End3 - End of Terminator
Sum of scores value for PWM1 [-35 box]
Sum of scores value for PWM2 [-10 box]
Sum of scores value for PWM3 [rho-independent terminator]
CSS - Cumulative sum of scores
-----------------------------------------------------------------

## Sheet: Sheet10
Sheet 10: Mycobacterium tuberculosis (AE000516.fna) hits in negative strand
Start1	D1	D2	End3	Score1	Score2	Score3	CSS	Strand	Comment
Hits not found
-----------------------------------------------------------------
Start1 - Start of the Promoter [-35] box
D1 - Spacer between [-35] & [-10] boxes
D2-Predicted length of sRNA transcript-encoding region
End3 - End of Terminator
Sum of scores value for PWM1 [-35 box]
Sum of scores value for PWM2 [-10 box]
Sum of scores value for PWM3 [rho-independent terminator]
CSS - Cumulative sum of scores
c-Complementary strand
-----------------------------------------------------------------

[truncated: 16 more sheets: Sheet11, Sheet12, Sheet13, Sheet14, Sheet15, Sheet16, Sheet17, Sheet18, Sheet19, Sheet20, Sheet21, Sheet22, Sheet23, Sheet24, Sheet25, Sheet26]
