# Supplementary material for: sRNAscanner: A Computational Tool for Intergenic Small RNA Detection in Bacterial Genomes
Source: PLOS journal article supplement (doi:10.1371/journal.pone.0011970), 2010-08-05
Supplement: S6 (10.1371/journal.pone.0011970.s006) [file journal.pone.0011970.s006]

**(A) PWM1-training**

|   |           |           |           |          |           |           |
|---|-----------|-----------|-----------|----------|-----------|-----------|
| A | -0.788457 | -0.200671 | -0.200671 | 0.969401 | -0.788457 | 0.435318  |
| C | -0.788457 | -0.788457 | -2.3979   | -2.3979  | 0.820981  | 0.167054  |
| G | -0.788457 | -2.3979   | 0.820981  | -2.3979  | -0.788457 | -0.788457 |
| T | 0.969401  | 0.969401  | -0.200671 | 0.167054 | -0.200671 | -0.200671 |

**(B) PWM2-training**

|   |           |           |           |           |           |         |
|---|-----------|-----------|-----------|-----------|-----------|---------|
| A | -2.3979   | 1.21302   | -0.788457 | 0.820981  | 0.646627  | -2.3979 |
| C | -2.3979   | -2.3979   | -0.200671 | -2.3979   | -0.200671 | -2.3979 |
| G | -0.788457 | -2.3979   | -0.788457 | -0.788457 | -0.200671 | -2.3979 |
| T | 1.21302   | -0.788457 | 0.820981  | 0.167054  | -0.788457 | 1.31568 |

**(C) PWM3-training**

|   |          |           |           |           |           |           |           |           |           |           |           |           |           |           |           |           |           |           |           |           |           |           |           |           |           |           |           |           |          |           |           |
|---|----------|-----------|-----------|-----------|-----------|-----------|-----------|-----------|-----------|-----------|-----------|-----------|-----------|-----------|-----------|-----------|-----------|-----------|-----------|-----------|-----------|-----------|-----------|-----------|-----------|-----------|-----------|-----------|----------|-----------|-----------|
| A | 0.127833 | -0.893818 | -0.257829 | -0.893818 | -0.893818 | -0.257829 | -0.526093 | -0.526093 | -0.04652  | -0.893818 | -0.526093 | -0.526093 | -0.257829 | -0.893818 | -1.4816   | -0.526093 | -1.4816   | -0.526093 | -0.526093 | -0.893818 | -0.257829 | 0.127833  | -0.526093 | 0.127833  | -0.04652  | 0.276253  | -0.257829 | 0.127833  | 0.405465 |           |           |
| C | -0.04652 | 0.405465  | 0.405465  | -0.04652  | 0.276253  | 0.127833  | 0.405465  | -0.04652  | -0.04652  | -0.04652  | -0.257829 | -0.257829 | 0.127833  | 0.127833  | -0.526093 | 0.276253  | -0.257829 | 0.127833  | -3.09104  | -0.257829 | -0.893818 | -1.4816   | -0.257829 | -1.4816   | -0.893818 | -0.526093 | -0.893818 | -0.257829 | -0.04652 | 0.127833  | -0.526093 |
| G | -0.04652 | 0.127833  | -0.04652  | 0.276253  | 0.127833  | -0.257829 | -0.257829 | 0.405465  | 0.405465  | 0.276253  | 0.276253  | 0.276253  | -0.04652  | -0.257829 | 0.519875  | 0.405465  | 0.62253   | 0.519875  | 0.276253  | -0.893818 | -1.4816   | -0.526093 | -1.4816   | -0.893818 | -0.257829 | -1.4816   | 0.127833  | -0.893818 | 0.276253 | -0.257829 | -0.04652  |
| T | -0.04652 | -0.04652  | -0.257829 | 0.276253  | 0.127833  | 0.276253  | 0.127833  | -0.04652  | -0.526093 | 0.276253  | 0.276253  | 0.276253  | 0.127833  | 0.405465  | -0.04652  | -0.257829 | 0.127833  | -0.526093 | 0.879249  | 0.800778  | 1.01983   | 1.01983   | 0.800778  | 0.800778  | 0.800778  | 0.71562   | 0.405465  | 0.405465  | -0.04652 | -0.04652  | -0.04652  |

**Figure S1.** Position weight matrices constructed using previously defined transcription signal data for ten known *E. coli* K12 MG1655 sRNA genes (see Table S1 for details). **(A)** PWM1 constructed using -35 promoter box data. **(B)** PWM2 constructed using -10 promoter box data. **(C)** PWM3 constructed using Rho-independent terminator box data. The above three training set-derived PWM were used in the analyses described in this study.
